RESEARCH ARTICLE

# Treatment Effects of Removable Functional Appliances in Pre-Pubertal and Pubertal Class II Patients: A Systematic Review and Meta-Analysis of Controlled Studies

Giuseppe Perinetti<sup>1\*</sup>, Jasmina Primožič<sup>2</sup>, Lorenzo Franchi<sup>3</sup>, Luca Contardo<sup>1</sup>

**1** Department of Medical, Surgical and Health Sciences, University of Trieste, Trieste, Italy, **2** Department of Orthodontics and Jaw Orthopaedics, Medical Faculty, University of Ljubljana, Ljubljana, Slovenia, **3** Department of Orthodontics, School of Dentistry, University of Florence, Florence, Italy, and Department of Orthodontics and Pediatric Dentistry, School of Dentistry, The University of Michigan, Ann Arbor, Michigan, United States of America

\* [G.Perinetti@fmc.units.it](mailto:G.Perinetti@fmc.units.it)

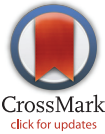

OPEN ACCESS

**Citation:** Perinetti G, Primožič J, Franchi L, Contardo L (2015) Treatment Effects of Removable Functional Appliances in Pre-Pubertal and Pubertal Class II Patients: A Systematic Review and Meta-Analysis of Controlled Studies. PLoS ONE 10(10): e0141198. doi:10.1371/journal.pone.0141198

**Editor:** Sompop Bencharit, University of North Carolina at Chapel Hill, UNITED STATES

**Received:** September 11, 2014

**Accepted:** October 6, 2015

**Published:** October 28, 2015

**Copyright:** © 2015 Perinetti et al. This is an open access article distributed under the terms of the [Creative Commons Attribution License](https://creativecommons.org/licenses/by/4.0/), which permits unrestricted use, distribution, and reproduction in any medium, provided the original author and source are credited.

**Data Availability Statement:** All relevant data are within the paper and its Supporting Information files.

**Funding:** The authors received no specific funding for this work.

**Competing Interests:** The authors have declared that no competing interests exist.

## Abstract

### Background

Treatment effects of removable functional appliances in Class II malocclusion patients according to the pre-pubertal or pubertal growth phase has yet to be clarified.

### Objectives

To assess and compare skeletal and dentoalveolar effects of removable functional appliances in Class II malocclusion treatment between pre-pubertal and pubertal patients.

### Search methods

Literature survey using the Medline, SCOPUS, LILACS and SciELO databases, the Cochrane Library from inception to May 31, 2015. A manual search was also performed.

### Selection criteria

Randomised (RCTs) or controlled clinical trials with a matched untreated control group. No restrictions were set regarding the type of removable appliance whenever used alone.

### Data collection and analysis

For the meta-analysis, cephalometric parameters on the supplementary mandibular growth were the main outcomes, with other cephalometric parameters considered as secondary outcomes. Risk of bias in individual and across studies were evaluated along with sensitivity analysis for low quality studies. Mean differences and 95% confidence intervals for annualised changes were computed according to a random model. Differences between pre-

pubertal and pubertal patients were assessed by subgroup analyses. GRADE assessment was performed for the main outcomes.

## Results

Twelve articles (but only 3 RCTs) were included accounting for 8 pre-pubertal and 7 pubertal groups. Overall supplementary total mandibular length and mandibular ramus height were 0.95 mm (0.38, 1.51) and 0.00 mm (-0.52, 0.53) for pre-pubertal patients and 2.91 mm (2.04, 3.79) and 2.18 mm (1.51, 2.86) for pubertal patients, respectively. The subgroup difference was significant for both parameters ( $p < 0.001$ ). No maxillary growth restraint or increase in facial divergence was seen in either subgroup. The GRADE assessment was low for the pre-pubertal patients, and generally moderate for the pubertal patients.

## Conclusions

Taking into account the limited quality and heterogeneity of the included studies, functional treatment by removable appliances may be effective in treating Class II malocclusion with clinically relevant skeletal effects if performed during the pubertal growth phase.

## Introduction

The mandibular condyles, including their cartilage, have a primary role in the development and growth of the oro-facial complex. In this regard, a deficient growth of the condyles may result in mandibular retrognathia, also referred as skeletal Class II malocclusion. Interestingly, animal studies have shown that forward mandibular displacement enhances condylar growth resulting in significant changes in the morphology of the Mandible [1], [2]. Such induced condylar growth has been shown to be characterized by a thickness of the condrogenic, proliferative, and hypertrophic layers of condylar cartilage on the posterior aspect of the condyle, thus yielding to an increase in total mandibular length [1], [2].

According to this biological evidence, an orthopaedic approach to treat skeletal Class II malocclusion in growing subjects is based on forward positioning of the mandible [3]. For this purpose, several removable or fixed appliances have been developed [3]. However, reviews reported very limited [4–6], partial [7] or relevant [8], [9] effectiveness of such treatment in terms of additional mandibular growth, i.e. correction of skeletal Class II malocclusion. The reason for this apparently inconsistent evidence might reside in the different interventions performed [8], [9] in the large variation in individual responsiveness to functional treatment [10], or in the timing, i.e. pre-pubertal or pubertal growth phase [11], during which treatment is performed. Indeed, growth does not occur at a constant rate and children of the same chronological age might not have equivalent skeletal maturity or growth potential [11]. Interestingly, while previous reviews focused mainly on the appliance type [7], [12], none has focused on the timing of intervention, although this issue has been raised years ago [8]. The only exception is a recent meta-analysis [13] on fixed appliances that reported significant skeletal effects for pubertal patients and not for post-pubertal ones.

A further ethical issue also relates to the clinical trials evaluating the effectiveness of functional treatment for skeletal Class II malocclusion. Indeed, leaving subjects with relevant malocclusions without orthodontic treatment during the pubertal growth phase or after, has limited the execution of randomized clinical trials (RCTs) at this stage of development.

Therefore, reviews including exclusively RCTs [4], [5], might have been focused mostly on pre-pubertal subjects, leaving the potential effects of treatment on pubertal patients excluded from the analysis. For this reason, the consideration of controlled clinical trials (CCTs) with reasonable methodological quality has been advocated [14]. Moreover, it has been reported that whenever RCTs are not available for meta-analysis, CCTs or observational studies may be used with essentially similar outcomes [15].

Whether the efficiency of functional treatment for skeletal Class II malocclusion is critically dependent on the timing of intervention has still not been clarified, especially for removable appliances. Yet, this information would have relevant clinical implications in terms of treatment planning. Therefore, the aim of the present review and meta-analysis of RCTs and CCTs was to assess the short-term skeletal (mainly supplementary mandibular growth) and dentoalveolar effects of removable functional appliances for the treatment of Class II malocclusion during the pre-pubertal or pubertal growth phase, as compared to matched untreated controls.

## Materials and Methods

### Search strategy

The present meta-analysis followed the Preferred Reporting Items for Systematic Reviews and Meta-Analyses (PRISMA) statement [16] (S1 PRISMA Checklist), used a previous systematic review as a template [13], and it has been registered at the PROSPERO database (<http://www.crd.york.ac.uk/PROSPERO>). Articles were identified through a literature survey carried out through the following databases: i) PubMed, ii) SCOPUS iii) Latin American and Caribbean Health Sciences (LILACS), iv) Scientific Electronic Library Online (SciELO), and v) The Cochrane Library. The survey covered the period from inception to the last access on May 31, 2015 with no language restrictions. The search algorithms used in each database have been published previously [13] and are reported in Table 1. Finally, a manual search was also performed by scoring the references within the studies examined and the titles of the papers published over the last 15 years among the following major journals: i) American Journal of Orthodontics and Dentofacial Orthopedics, ii) European Journal of Orthodontics, iii) Journal of Orofacial Orthopedics, iv) Korean Journal of Orthodontics, v) Orthodontics and Craniofacial Research; vi) Progress in Orthodontics, vii) The Angle Orthodontist, and viii) World Journal of Orthodontics. The eligibility assessment was performed independently by two blinded authors (GP and JP). The intra-examiner reliability in the study selection process was assessed

**Table 1. The search algorithms used in the literature search according to each database.**

| Database                                                                                                                   | Algorithm                                                                                                                                                                                                                                                                                                                                                      | Hits  |
|----------------------------------------------------------------------------------------------------------------------------|----------------------------------------------------------------------------------------------------------------------------------------------------------------------------------------------------------------------------------------------------------------------------------------------------------------------------------------------------------------|-------|
| Medline, Entrez PubMed <a href="http://www.ncbi.nlm.nih.gov">www.ncbi.nlm.nih.gov</a>                                      | "Orthodontic appliances, Functional"[Mesh] OR "Orthodontic appliances"[All Fields] OR "functional"[All Fields] AND ("Malocclusion, Angle Class II"[Mesh] OR "jaw"[All Fields] OR "orthop*" [All Fields]) AND (("Class"[All Fields] AND "II"[All Fields] AND "Malocclusion"[All Fields]) OR ("Angle"[All Fields] AND "Class"[All Fields] AND "II"[All Fields])) | 2,087 |
| SCOPUS <a href="http://www.scopus.com">www.scopus.com</a>                                                                  | TITLE-ABS-KEY(((orthodontic appliance) OR (functional jaw orthopedics)) AND ((class ii malocclusion) OR (angle class ii))) AND (LIMIT-TO(DOCTYPE, "ar") OR LIMIT-TO(DOCTYPE, "ip")) AND (LIMIT-TO(SUBJAREA, "DENT") OR LIMIT-TO(SUBJAREA, "MULT"))                                                                                                             | 1,303 |
| LILACS <a href="http://lilacs.bvsalud.org">http://lilacs.bvsalud.org</a>                                                   | ((Orthodontic appliance) OR (Functional jaw orthopedics)) AND ((Class II malocclusion) OR (Angle Class II))                                                                                                                                                                                                                                                    | 251   |
| Cochrane Library (Registered Controlled trials) <a href="http://www.thecochranelibrary.com">www.thecochranelibrary.com</a> | ((Orthodontic appliance) OR (Functional jaw orthopedics)) AND ((Class II malocclusion) OR (Angle Class II))                                                                                                                                                                                                                                                    | 215   |
| SciELO <a href="http://www.scielo.org">http://www.scielo.org</a>                                                           | ((Orthodontic appliance) OR (Functional jaw orthopedics)) AND ((Class II malocclusion) OR (Angle Class II))                                                                                                                                                                                                                                                    | 28    |

doi:10.1371/journal.pone.0141198.t001

through the Cohen  $k$  test assuming a threshold value of 0.61 [17]. Conflicts were resolved by discussion of each article, until consensus was reached. An attempt to contact the corresponding Authors of the included studies was made to retrieve any missing information or clarification of specific items.

### Eligibility criteria

The studies retrieved had to be RCTs or either prospective or retrospective CCTs. They had to include healthy patients treated during the pre-pubertal or pubertal growth phases. These studies had to investigate the skeletal and dentoalveolar effects with no restriction as to the type of parameters collected, as long as at least one of the main outcomes (see below) was included. Also, no restrictions were set regarding the type of removable appliance whenever used alone without any other additional therapy (fixed, extra-oral traction, etc.), treatment length or to the cephalometric analysis used. Studies were excluded if a reliable indicator of growth phase (hand-and-wrist maturation [HWM] method or cervical vertebral maturation [CVM] method) was not used. Further inclusions and exclusion criteria are listed in detail in [Table 2](#).

### Data items

The following data were extracted independently by two authors (GP and JP): study design, prospective or retrospective enrolment of the treated group, sample size, gender distribution, age, type of functional appliance used, Class II description, indicators of skeletal maturity and distribution of subjects according to growth phase, prognostic or other features, cephalometric magnification factor, full treatment and observational duration, mandibular advancement for treated patients and when treatment was stopped. Regarding the treatment effects, the following items were also collected: success rate (as defined in different studies), skeletal,

**Table 2. Inclusion and exclusion criteria used in the present review.**

| <b>Inclusion criteria</b>                                                                                                                                        |
|------------------------------------------------------------------------------------------------------------------------------------------------------------------|
| 1. Longitudinal studies, either prospective or retrospective, on healthy growing subjects treated for skeletal Class II malocclusion due to mandibular retrusion |
| 2. Use of removable functional orthodontic appliances                                                                                                            |
| 3. Use of a reliable indicator of individual skeletal maturity to assess treatment timing that had to be either pre-pubertal or pubertal                         |
| 4. Use of matched control groups of untreated Class II malocclusion subjects with similar growth phase                                                           |
| 5. Reporting treatment effects data according to parameters collected before and at the end of functional treatments                                             |
| <b>Exclusion criteria</b>                                                                                                                                        |
| 1. Case reports, case series with no statistical analysis, comments, letters to the Editor, reviews                                                              |
| 2. Studies using the headgear alone or in combination with other functional appliances                                                                           |
| 3. Studies in which the compared treated groups were subjected to different treatment modalities                                                                 |
| 4. Studies in which treatment length was significantly different than the observational time length of the control group                                         |
| 5. Studies in which orthodontic treatment was combined with fixed appliances, mini-implants or surgery                                                           |
| 6. Studies without cephalometric analyses or without measures defined herein as primary outcomes                                                                 |
| 7. Studies in which a favourable response to treatment (according to the Authors' definition) was an inclusion criterion                                         |
| 8. Studies in which skeletal maturation was assessed but subjects with different stages were pooled in the same treated or control group                         |
| 9. Studies in which the control group was based on published reference standards without a specific matching of the groups by age, gender, and other features    |

doi:10.1371/journal.pone.0141198.t002

dentoalveolar and soft tissues effects, and Authors' conclusions on the growth phase and treatment efficiency. Forms used for data extraction were mostly pre-defined at the protocol stage by two authors (GP and LC).

## Assessment of risk of bias in individual studies

No single approach in assessing methodological soundness may be appropriate to all systematic reviews [18]. Therefore, risk of bias in individual studies was assessed according to the Cochrane Collaboration's Tool [19] and a slightly modified Downs and Black tool [20] for randomised and non-randomised trials, respectively.

The items included in the Cochrane Collaboration's Tool [19] are defined as: sequence generation, allocation concealment, blinding, incomplete outcome data (i.e., drop-out information or cephalometric magnification), selective outcome reporting (i.e., relevant cephalometric parameters), and other risks of bias. In particular, the 'other bias' domain included a set of pre-specified entries defined as: i) inclusion of Class II patients relying on overjet alone, which cannot account for a true skeletal Class II malocclusion [21]; ii) lack of analysis of other potentially relevant diagnostic/prognostic features, such as facial divergence, maxillary protrusion, or condylar angle [10].

The original Downs and Black tool is calculated by rating each study across a variety of domains including reporting (10 items), external validity (3 items), internal validity—bias (7 items), internal validity—confounding (6 items), and power (1 item) with maximum score of 32 [20]. In the present review, only minor adaptations were followed to adhere with the studies dealing with functional treatment for Class II malocclusion. These were as follows: i) items were added in the reporting section as: 'Were inclusion and exclusion criteria clearly stated?' (yes, 1 point; no or unclear, 0 points); 'Is the Class II malocclusion fully described?' (fully described including skeletal parameters, or at least reporting a full molar Class II, 1 point; no, 0 points); ii) the original item #14 'Was an attempt made to blind study subjects to the intervention they have received?' was removed as this is not applicable; iii) the original item #20 'Were the main outcome measures accurate (reliable and repeatable)?' was used to derive 2 items for the reliability of the skeletal maturation staging and cephalometric measurements (yes, 1 point; no or unclear, 0 points); iii) The last item on the power was simplified as follows: 'Prior estimate of sample size' (yes, 1 point; no or unclear, 0 points). The maximum score for this modified Downs and Black tool is thus 29. Evaluation was performed without blinding by two Authors (GP and JP) and conflicts were resolved by discussion. A third Author (LC) was consulted if necessary.

## Assessment of risk of bias across studies

Heterogeneity was assessed using the  $\chi^2$ -based Q-statistic method with a significant p value  $<0.1$ . However, because of the moderate insensitivity of the Q statistic [22], an  $I^2$  index was also reported with values  $\geq 50\%$  considered associated to a substantial heterogeneity among the studies [23]. In particular, the  $I^2$  index describes the percentage of total variation across studies due to heterogeneity rather than chance. The  $\tau^2$  was also calculated for the heterogeneity assessment. The Review Manager software version 5.2.6 (<http://www.cochrane.org>) was used for the assessment of heterogeneity. Moreover, the Egger test [24] and the Begg and Mazumdar rank correlation test [25] were employed to assess publication bias and to compensate for possible lack of power [26], with significant p value set at  $p < 0.1$ . Calculations were performed using the Comprehensive Meta-Analysis software version 2.0 (Biostat Inc., Englewood, NJ, USA).

## Primary and secondary outcomes

For the meta-analysis, primary outcomes included those cephalometric parameters related to mandibular growth, and expressed as supplementary growth in comparison to the untreated controls. They were: 1) total mandibular length, 2) mandibular ramus height, 3) composite mandibular length (according to Pancherz Analysis) [27], and 4) mandibular base (according to Pancherz Analysis) [27]. Secondary outcomes, again as supplementary changes in comparison to the untreated controls, were: 1) SNA, 2) SNB and 3) ANB angles, 4) maxillary base (according to Pancherz Analysis) [27], 5) total facial divergence, and 6) mandibular incisor proclination (relative to the mandibular plane). Although the measures of total mandibular length, mandibular ramus height, facial divergence, and lower incisor proclination differed slightly among the studies, these were combined in the overall effects according to the concept that the differences in the intra-group changes would be poorly sensitive to the absolute measures from which they are derived.

## Summary measures and synthesis of results

The mean difference was used for statistical pooling of data and results were expressed as mean and 95% confidence intervals (CIs). Moreover, 90% prediction intervals were also calculated as previously reported [28]. Subgroup analyses were performed whenever possible according to the growth phase, pubertal or post-pubertal, during which treatment was performed. Moreover, to account for the heterogeneity of the treatments, i.e. differences among the appliance used, treatment length, and cephalometric analysis, a random effect model was used for calculations of all the overall effects [29]. No studies including two or more treated groups compared to a single control group were retrieved. Finally, these analyses were reported according to the different subgroups of pre-pubertal and pubertal subjects and shown through forest plots. Treatment duration was noteworthy different among the retrieved studies; therefore, when not already reported in the articles, annualised changes for all the parameters were calculated and used for meta-analysis. Furthermore, whenever necessary and possible, the magnification for linear parameters was set at 0%. The Review Manager software was used for meta-analysis (S1 Table).

## Additional analysis

As for the main analyses, all the additional analyses were performed according to the pre-pubertal and pubertal subgroups. Robustness of the meta-analysis for each outcome was assessed by sensitivity analysis, carried out with the Comprehensive Meta-Analysis software, that was run by eliminating studies one-by-one, and differences in estimations above 0.5 mm (for linear outcomes) or 0.5° (for angular outcomes) were considered as clinically relevant. Moreover, the overall quality of evidence for each of the primary outcomes, according to the pre-pubertal and pubertal subgroups, was evaluated following the Grades of Recommendation, Assessment, Development, and Evaluation (GRADE) guidelines using the GRADE profiler software version 3.6.1 ([www.gradeworkinggroup.org](http://www.gradeworkinggroup.org)) [30]. The GRADE assesses the quality of evidence as high, moderate, low and very low based on eight different domains as follows: i) risk of bias, ii) inconsistency, iii) indirectness, iv) imprecision, v) publication bias, vi) large effect, vii) plausible confounding that would change effect, and viii) dose response gradient [31]. Although the GRADE has been developed for RCTs, also CCTs were entered in the profiler software as randomised studies, provided that they were downgraded by 1 point in the 'risk of bias' domain. All the other GRADE domains were filled according to the published recommendations [30] with the exception of the 'large effect' domain score that was determined on data regarding differential growth increment in untreated Class II and Class I subjects [32]. In particular, the mean annualised changes for the cephalometric measurements in the pre-pubertal and pubertal subjects were



derived from this reported growth study [32]. Subsequently, 1 mm was added to account for the cephalometric method error, as this value may be considered representative of linear cephalometric error measurements. Therefore, by a slight excess approximation the large effects were set as 1.5 mm/year for all the primary outcomes for pre-pubertal patients, and as 2.5 mm/year for total and composite mandibular length (Pancherz analysis), and as 2.0 mm/year and 1.5 mm/year for the mandibular ramus height and mandibular base (Pancherz analysis), respectively, in pubertal patients. A very large effect was set by adding 1 mm to each threshold. Moreover, due to the lack of reporting for the composite mandibular length and mandibular base (Pancherz analysis), the total mandibular length and Pogonion to Nasion perpendicular [32], respectively, were used instead to elaborate dimensions of the effect.

## Results

### Study search

The results of the electronic and manual searches are summarised in Fig 1. According to the electronic search, a total of 2,458 articles were retrieved. Among these, 12 studies [33–44] were

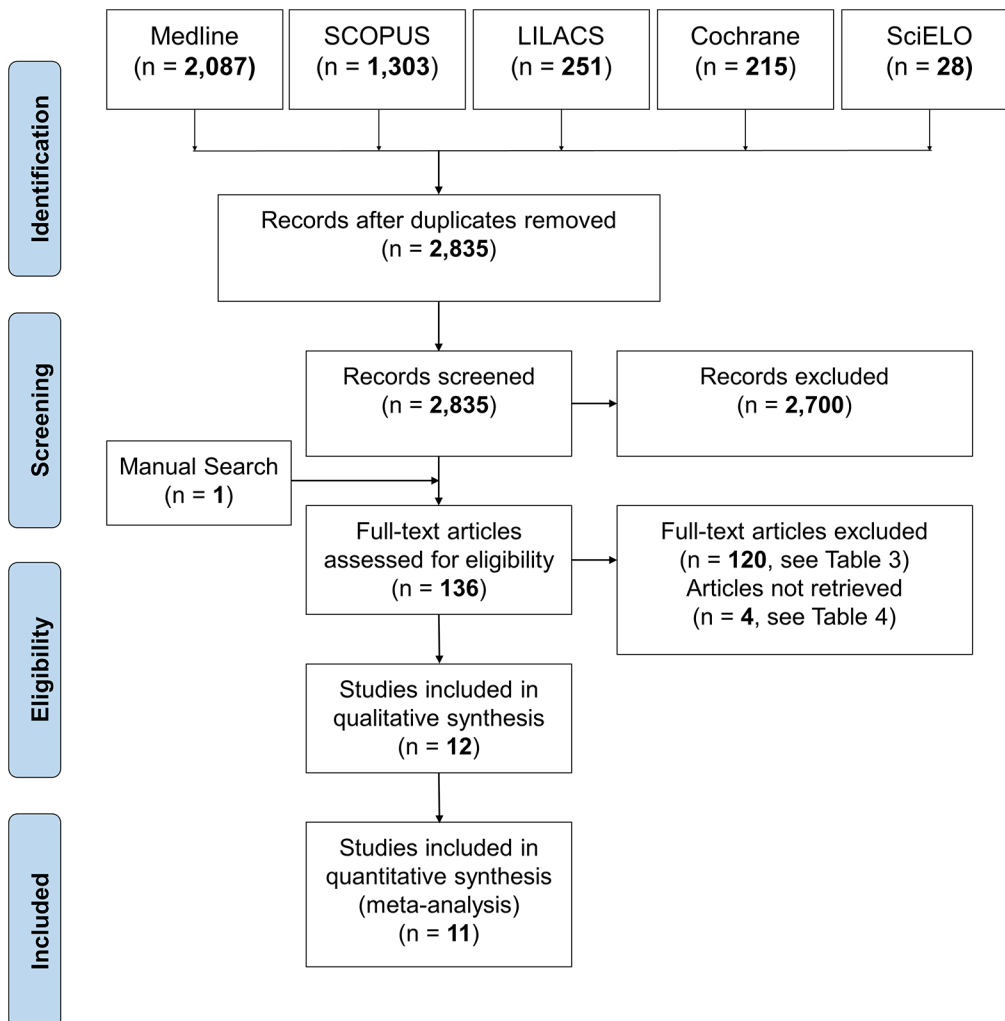

Fig 1. Flow diagram of the search strategy.

doi:10.1371/journal.pone.0141198.g001

judged to be relevant to the present review. However, 2 articles were clearly derived from the same study sample reporting either the results about soft tissues and SNA, SNB and ANB angles [41] or other dentoskeletal effects [44] and may be considered as a single study. Full details of the excluded studies at the full text analysis are reported in the Table 3. Four studies could not be retrieved upon internet search, through the local library facility, and after having contacted the Authors (Table 4). Finally, 1 study [40] included in the qualitative synthesis, was not included in the meta-analysis according to the risk of bias and sensitivity analyses (see below).

## Study design and treatment interventions

Details on study designs and interventions of the included studies are summarised in Table 5. A total of three RCTs were retrieved, including both pre-pubertal [33], [36] and pubertal [42] subjects. Four studies [33], [36], [38], [43] included only pre-pubertal subjects, 4 more studies [37], [39], [41], [42], [44] included only pubertal subjects, and 3 studies [34], [35], [40] included both pre-pubertal and pubertal subjects. The enrolment of the treated group was prospective in 6 studies [33], [36–38], [41], [42], [44], and retrospective in the rest of the studies.

The sample size per group ranged from a minimum of 5 [40] to a maximum of 89 [36] for the pre-pubertal groups, and from 10 [35] to 29 [40] for the pubertal groups. The mean subjects age ranged from 8.9 [43] to 10.3 [38] years for the pre-pubertal groups, and from 9.5 [37] to 14.0 [34], for the pubertal groups. All the studies included both male and female subjects. The removable functional appliances used were Twin-Block [34], [36], [37], [39–41], [44], Bio-nator [33], [35], [38], Function regulator type 2 (FR-2) [43] and Sander bite jumping [42]. Two RCTs [33], [36] assessed Class II malocclusion only on the basis of an overjet  $\geq 7$  mm, 3 studies [34], [35], [42] included subjects that had to have a full Class II molar relationship, the rest of the studies [37–41], [43], [44] generally assessed Class II malocclusion by a combination of ANB angle  $> 4^\circ$  (at least) and Class II molar relationship. To assess growth phase, 6 studies used the CVM method [34–36], [38], [40], [42], while the rest used various HWM method [33], [37], [39], [41], [43], [44]. Four studies, 2 on pre-pubertal [40], [43] and 2 on pubertal subjects [40], [42], reported a normal sagittal position of the maxilla in the included patients. One study [40] on both pre-pubertal and pubertal patients, and more 3 studies [40], [42], [44] on pubertal patients reported an absence of vertical facial growth. The rest of the studies did not report any further prognostic or diagnostic feature, with the exception of some dental maturation stage [33] or presence of deep bite [39]. Cephalometric magnifications were set at 0% [34–36], [40], [42], 8–9% [38], [43], or 14% [41], [44]. In the rest of the studies, information was not provided. The mean treatment duration for the pre-pubertal subjects ranged from 1 year [40] to 2.1 years [35] with the appliance being worn at least 18 hours per day [43] to full time wear [34], [36], [40]. However, 3 studies [33], [35], [38] on pre-pubertal subjects did not report any information about appliance wear in terms of hours per day.

The mean treatment duration in the pubertal subjects ranged from 1 year [37] to 1.8 years [35], with the appliance being worn at least 14 hours per day [42] to full time wear [34], [37], [40]. Two studies [35], [39] on pubertal subjects did not report the mean appliance wear time. In 1 study [40] including both pre-pubertal and pubertal subjects, treatment duration lasted for 1 year although post-treatment measurements were performed after an additional year of retention. Generally, a single mandibular advancement to an incisor end-to-end relationship was performed for overjet up to 7–10 mm; otherwise, a 2-step procedure was followed [33], [34], [36], [37], [40], [42]. Mandibular advancement by 70% of the maximum protrusive path was used in 1 study [41], [44]. Furthermore, a stepwise advancement of less than 3 mm was performed in one study [43]. Other studies did not report the amount of mandibular



**Table 3. Studies excluded after full text consideration with corresponding main reason of exclusion.**

| Authors                        | Year | Reference                                 | Main Reason for exclusion             |
|--------------------------------|------|-------------------------------------------|---------------------------------------|
| 1. Jakobsson                   | 1967 | Am J Orthod 53:446–57                     | No skeletal maturation evaluation     |
| 2. Freunthaller                | 1967 | Angle Orthod 37:18–22                     | No skeletal maturation evaluation     |
| 3. Fraenkel                    | 1969 | Am J Orthod 55:265–75                     | No skeletal maturation evaluation     |
| 4. Luedtke                     | 1973 | Am J Orthod 63:18–29                      | No skeletal maturation evaluation     |
| 5. Lewis                       | 1976 | Am J Orthod 70: 529–549                   | Case series                           |
| 6. Bernstein <i>et al.</i>     | 1976 | Am J Orthod 70:683–9                      | No skeletal maturation evaluation     |
| 7. Ahlgern and Laurin          | 1976 | Br J Orthod 3:181–7                       | No control group                      |
| 8. Bernstein <i>et al.</i>     | 1977 | Am J Orthod 72: 549–559                   | Headgear treatment                    |
| 9. Brunner                     | 1979 | Rev Orthop Dento Facial 13:269–73         | Expert opinion                        |
| 10. Wieslander and Lagerström  | 1979 | Am J Orthod 79:20–6                       | No skeletal maturation evaluation     |
| 11. Bonnefont and Charron      | 1979 | Rev Orthop Dento Facial 13:39–48          | No skeletal maturation evaluation     |
| 12. Luder                      | 1981 | Eur J Orthod 3:205–22                     | No skeletal maturation evaluation     |
| 13. Baumrind and Korn          | 1981 | Am J Orthod 80:31–47                      | No skeletal maturation evaluation     |
| 14. Cohen                      | 1981 | Br J Orthod 8:159–63                      | No skeletal maturation evaluation     |
| 15. Klaassen                   | 1981 | J Oral Surg 39:849–54                     | Case report                           |
| 16. Luder                      | 1982 | Am J Orthod 81:390–6                      | No skeletal maturation evaluation     |
| 17. Calvert                    | 1982 | Br J Orthod 9:149–53                      | No skeletal maturation evaluation     |
| 18. Baumrind <i>et al.</i>     | 1983 | Am J Orthod 84:443–65                     | No skeletal maturation evaluation     |
| 19. Choroschilkina and Malygin | 1984 | 1984 Fortsch Kieferorthop 45 448–4        | No skeletal maturation evaluation     |
| 20. Brieden <i>et al.</i>      | 1984 | Angle Orthod 54:226–32                    | Not reporting primary outcomes        |
| 21. Madone and Ingervall       | 1984 | Eur J Orthod 6:92–106                     | Not including a control group         |
| 22. Vargervik and Harvold      | 1985 | Am J Orthod 88:242–51                     | No skeletal maturation evaluation     |
| 23. McNamara <i>et al.</i>     | 1985 | Am J Orthod 88:91–110                     | No skeletal maturation evaluation     |
| 24. Haynes                     | 1986 | Angle Orthod 56:309–14                    | No skeletal maturation evaluation     |
| 25. Haynes                     | 1986 | Am J Orthod Dentofacial Orthop 90:308–20  | No skeletal maturation evaluation     |
| 26. Stefani and Munster        | 1987 | Fortschr Kieferorthop 48:154–60           | Case series                           |
| 27. DeVincenzo <i>et al.</i>   | 1987 | Am J Orthod Dentofacial Orthop 91:213–24  | No skeletal maturation evaluation     |
| 28. Fjilgen <i>et al.</i>      | 1987 | Fortschr Kieferorthop 48:41–51            | No skeletal maturation evaluation     |
| 29. Enlow <i>et al.</i>        | 1988 | Eur J Orthod 10:192–202                   | No skeletal maturation evaluation     |
| 30. Falck and Frankel          | 1989 | Am J Orthod Dentofacial Orthop 96:333–41  | No skeletal maturation evaluation     |
| 31. DeVincenzo and Winn        | 1989 | Am J Orthod Dentofacial Orthop 96:181–90  | No skeletal maturation evaluation     |
| 32. Kerr <i>et al.</i>         | 1989 | Eur J Orthod 11:235–42                    | No skeletal maturation evaluation     |
| 33. Dahan <i>et al.</i>        | 1989 | Am J Orthod Dentofacial Orthop 95:127–37  | No skeletal maturation evaluation     |
| 34. McNamara <i>et al.</i>     | 1990 | Am J Orthod Dentofacial Orthop 98:134–44  | No skeletal maturation evaluation     |
| 35. Stüber                     | 1990 | Fortschr Kieferorthop 51:361–5            | No skeletal maturation evaluation     |
| 36. Jakobsson and Paulin       | 1990 | Eur J Orthod 12:174–84                    | No skeletal maturation evaluation     |
| 37. Derringer                  | 1990 | Br J Orthod 17:33–46                      | No skeletal maturation evaluation     |
| 38. Drage and Kunt             | 1990 | Br J Orthod 17:205–13                     | Limited to successful cases           |
| 39. Falck                      | 1991 | 1991 Fortsch Kieferorthop 52:263–7        | No skeletal maturation evaluation     |
| 40. Falck and Zimmermann       | 1991 | 1991 Fortsch Kieferorthop 52:98–101       | No skeletal maturation evaluation     |
| 41. Ball and Hunt              | 1991 | Eur J Orthod 13:53–8                      | No skeletal maturation evaluation     |
| 42. Ball and Hunt              | 1991 | Eur J Orthod 13:47–52                     | No skeletal maturation evaluation     |
| 43. Nelson <i>et al.</i>       | 1993 | Am J Orthod Dentofacial Orthop 104:153–61 | No skeletal maturation evaluation     |
| 44. Vaden <i>et al.</i>        | 1995 | Am J Orthod Dentofacial Orthop 107:651–61 | Mixing different treatment modalities |
| 45. Sander and Wichelhaus      | 1995 | 1995 Fortsch Kieferorthop 56:127–39       | No skeletal maturation evaluation     |
| 46. Lange <i>et al.</i>        | 1995 | Angle Orthod 65:423–30                    | No skeletal maturation evaluation     |
| 47. Webster <i>et al.</i>      | 1996 | Am J Orthod Dentofacial Orthop 110:46–53  | No skeletal maturation evaluation     |

(Continued)

Table 3. (Continued)

| Authors                         | Year | Reference                                         | Main Reason for exclusion                           |
|---------------------------------|------|---------------------------------------------------|-----------------------------------------------------|
| 48. Courtney <i>et al.</i>      | 1996 | Am J Orthod Dentofacial Orthop 109:616–24         | No skeletal maturation evaluation                   |
| 49. Battagel                    | 1996 | Eur J Orthod 18:41–54                             | No skeletal maturation evaluation                   |
| 50. Perillo <i>et al.</i>       | 1996 | Am J Orthod Dentofacial Orthop 109:132–9          | No skeletal maturation evaluation                   |
| 51. Kumar <i>et al.</i>         | 1996 | J Clin Pediatr Dent 20:101–8                      | No skeletal maturation evaluation                   |
| 52. Cura and Sarac              | 1997 | Eur J Orthod 19:691–702                           | Mixing different treatment modalities               |
| 53. de Oliveira and de Oliveira | 1997 | Journal Brasileiro de Odontologia Clinica 1:51–63 | No skeletal maturation evaluation                   |
| 54. Illing <i>et al.</i>        | 1998 | Eur J Orthod 20:501–16                            | No skeletal maturation evaluation                   |
| 55. Mills and McCulloch         | 1998 | Am J Orthod Dentofacial Orthop 114:15–24          | No skeletal maturation evaluation                   |
| 56. Lund <i>et al.</i>          | 1998 | Am J Orthod Dentofacial Orthop 113: 104–110       | No skeletal maturation evaluation                   |
| 57. Keeling <i>et al.</i>       | 1998 | Am J Orthod Dentofacial Orthop 113:40–50          | No skeletal maturation evaluation                   |
| 58. Özbek <i>et al.</i>         | 1998 | Angle Orthod 68:327–336                           | Unclear skeletal maturation assessment/distribution |
| 59. Toth and McNamara           | 1999 | Am J Orthod Dentofacial Orthop 116:597–609        | No skeletal maturation evaluation                   |
| 60. Tümer and Gültan            | 1999 | Am J Orthod Dentofacial Orthop 116:460–8          | Unclear skeletal maturation assessment/distribution |
| 61. Rushfordt <i>et al.</i>     | 1999 | Br J Orthod 26:127–34                             | No skeletal maturation evaluation                   |
| 62. Lai <i>et al.</i>           | 1999 | Hua Xi Kou Qiang Yi Xue Za Zhi 17:271–4           | Not including a control group                       |
| 63. Ehmer <i>et al.</i>         | 1999 | J Orofac Orthop 60:392–408                        | Redundant publication                               |
| 64. Mills and McCulloch         | 2000 | Am J Orthod Dentofacial Orthop 118:24–33          | Limited to successful cases                         |
| 65. Trenauth                    | 2000 | Am J Orthod Dentofacial Orthop 117:54–59          | No skeletal maturation evaluation                   |
| 66. Trenauth <i>et al.</i>      | 2001 | J Orofac Orthop 62:466–75                         | No skeletal maturation evaluation                   |
| 67. Chadwick <i>et al.</i>      | 2001 | Eur J Orthod 23:495–505                           | No skeletal maturation evaluation                   |
| 68. Vardimon <i>et al.</i>      | 2001 | Am J Orthod Dentofacial Orthop 120:416–26         | No skeletal maturation evaluation                   |
| 69. Eckardt <i>et al.</i>       | 2001 | J Orofac Orthop 62:337–49                         | No skeletal maturation evaluation                   |
| 70. Üçüncü <i>et al.</i>        | 2001 | J Orofac Orthop 62:224–37                         | No skeletal maturation evaluation                   |
| 71. Lux <i>et al.</i>           | 2001 | Angle Orthod 71:120–6                             | No skeletal maturation evaluation                   |
| 72. Ruf <i>et al.</i>           | 2001 | Angle Orthod 71:4–11                              | Inappropriate control group                         |
| 73. de Almeida                  | 2001 | R Dental Press Ortodon Ortop Facial 6:11–27       | No skeletal maturation evaluation                   |
| 74. Trenauth                    | 2002 | Eur J Orthod 24:485–91                            | Inappropriate control group                         |
| 75. de Almeida <i>et al.</i>    | 2002 | Angle Orthod 72:418–25                            | No skeletal maturation evaluation                   |
| 76. de Almeida <i>et al.</i>    | 2002 | Am J Orthod Dentofacial Orthop 121:458–66         | No skeletal maturation evaluation                   |
| 77. Wheeler <i>et al.</i>       | 2002 | Am J Orthod Dentofacial Orthop 121:9–17           | Unclear skeletal maturation assessment/distribution |
| 78. Oliveira                    | 2002 | R Dental Press Ortodon Ortop Facial 7:55–63       | No skeletal maturation evaluation                   |
| 79. Janson <i>et al.</i>        | 2003 | Eur J Orthod 25:301–9                             | No skeletal maturation evaluation                   |
| 80. Basciftci <i>et al.</i>     | 2003 | Eur J Orthod 25:87–93                             | No skeletal maturation evaluation                   |
| 81. Cevidanes <i>et al.</i>     | 2003 | Am J Orthod Dentofacial Orthop 123:379–87         | Not reporting primary outcomes                      |
| 82. Cozza <i>et al.</i>         | 2004 | Angle Orthod 74:741–48                            | No skeletal maturation evaluation                   |
| 83. Araujo <i>et al.</i>        | 2004 | Am J Orthod Dentofacial Orthop 126:666–71         | No skeletal maturation evaluation                   |
| 84. Araujo <i>et al.</i>        | 2004 | Eur J Orthod 26:515–22                            | No skeletal maturation evaluation                   |
| 85. Cozza <i>et al.</i>         | 2004 | Eur J Orthod 26:293–302                           | No skeletal maturation evaluation                   |
| 86. Tulloch <i>et al.</i>       | 2004 | Am J Orthod Dentofacial Orthop 125:657–67         | Second phase of an already included study           |
| 87. Almeida <i>et al.</i>       | 2004 | Eur J Orthod 26:65–72                             | No skeletal maturation evaluation                   |
| 88. Jena <i>et al.</i>          | 2005 | J Clin Pediatr Dent 29:225–30                     | No skeletal maturation evaluation                   |
| 89. Šidlauskas                  | 2005 | Stomatologija 7:7–10                              | No skeletal maturation evaluation                   |
| 90. Cevidanes <i>et al.</i>     | 2005 | Am J Orthod Dentofacial Orthop 128:16–26          | Not reporting primary outcomes                      |
| 91. Cevidanes <i>et al.</i>     | 2005 | Am J Orthod Dentofacial Orthop 128:27–34          | Not reporting primary outcomes                      |
| 92. Wedler <i>et al.</i>        | 2006 | J Orofac Orthop 67:105–15                         | No skeletal maturation evaluation                   |
| 93. Türkkahraman and Özgür      | 2006 | Eur J Orthod 28:27–34                             | No skeletal maturation evaluation                   |
| 94. Jena <i>et al.</i>          | 2006 | Am J Orthod Dentofacial Orthop 130:594–602        | Not reporting primary outcomes                      |

(Continued)

Table 3. (Continued)

| Authors                         | Year | Reference                                       | Main Reason for exclusion                                   |
|---------------------------------|------|-------------------------------------------------|-------------------------------------------------------------|
| 95. Dolce et al.                | 2007 | Am J Orthod Dentofacial Orthop 132:481–9        | No skeletal maturation evaluation                           |
| 96. Parsekian Martins et al.    | 2008 | Am J Orthod Dentofacial Orthop 134:732–41       | No skeletal maturation evaluation                           |
| 97. Woods                       | 2008 | Am J Orthod Dentofacial Orthop 133:388–94       | No skeletal maturation evaluation                           |
| 98. Varlik et al.               | 2008 | Eur J Orthod 30:128–34                          | Not reporting primary outcomes                              |
| 99. O'Brien                     | 2009 | Am J Orthod Dentofacial Orthop 135:573–9        | No skeletal maturation evaluation                           |
| 100. Jena and Duggal            | 2010 | Angle Orthod 80:485–91                          | No skeletal maturation evaluation                           |
| 101. Baccetti and McNamara      | 2010 | Prog Orthod 11:118–26                           | Mixing different treatment modalities                       |
| 102. Siara-Olds et al.          | 2010 | Angle Orthod 80:18–29                           | Unclear skeletal maturation assessment/distribution         |
| 103. Malta et al.               | 2010 | Angle Orthod 80:10–7                            | Unclear skeletal maturation assessment/distribution         |
| 104. Li et al.                  | 2010 | Hua Xi Kou Qiang Yi Xue Za Zhi 28:637–40        | Not reporting primary outcomes                              |
| 105. Nedeljkovic                | 2011 | Principles in Contemporary Orthodontics: 79–112 | No skeletal maturation evaluation                           |
| 106. Perillo et al.             | 2011 | Eur J Pediatr Dent 12:261–6                     | No short term effects evaluated                             |
| 107. Barros Nunes et al.        | 2011 | Orthod Sci Pract 3:517–23                       | No skeletal maturation evaluation                           |
| 108. Brunharo et al.            | 2011 | Dental Press J Orthod 16:40.e1–8                | Samples apparently included in another included study       |
| 109. Mahamad et al.             | 2012 | Int J Orthod Milwaukee 23:49–58                 | No skeletal maturation evaluation                           |
| 110. Alió-Sanz et al.           | 2012 | Med Oral Patol Oral Cir Bucal 17:e884–92        | Skeletal maturation assessment not valid                    |
| 111. Alió-Sanz et al.           | 2012 | Med Oral Patol Oral Cir Bucal 17:e689–96        | Not reporting primary outcomes                              |
| 112. Silvestrini-Biavati et al. | 2012 | Eur J Pediatr Dent 13:301–6                     | Unappropriated control group                                |
| 113. Singh et al.               | 2012 | J of Oral Biol Craniofac Res 2:61–66            | Case series                                                 |
| 114. Pieri et al.               | 2012 | OrtodontiaSPO 45:525–36                         | Inconsistent durations of treatment and observational terms |
| 115. Jena et al.                | 2013 | Angle Orthod 83:728–734                         | No skeletal maturation evaluation                           |
| 116. Antunes et al.             | 2013 | Angle Orthod 83:455–9                           | Not reporting primary outcomes                              |
| 117. Uzuner et al.              | 2014 | J Orofac Orthop 75:275–86                       | No skeletal maturation evaluation                           |
| 118. Saikoski et al.            | 2014 | Dental Press J Orthod 19:36–45                  | No skeletal maturation evaluation                           |
| 119. Bigliazzi et al.           | 2014 | Angle Orthod 3 Dec Epub                         | Not reporting primary outcomes                              |
| 120. Giuntini et al.            | 2015 | Angle Orthod 18 Mar Epub                        | Mixing different skeletal maturation phases into same group |

doi:10.1371/journal.pone.0141198.t003

advancement during treatment. Treatment was stopped when a Class I molar relationship [42], [43], or a normal overjet was achieved in a mandibular retruded position [36], [41], [44]. In 1 RCT [33] treatment was performed for at least 15 months and continued if clinical objectives were not achieved. The rest of the studies did not report when treatment was stopped.

Table 4. Studies that could not be retrieved for full text analysis.

1. Falck F. [Sagittal and vertical changes in mandibular retrognathism. A telerradiological longitudinal study of patients with functional regulators compared to a control group]. Stomatol DDR. 1983;33:182–95. Article in German.
2. Demisch A. [Long-term observation of the occlusal stability after distal bite therapy with the Bern activator]. SSO Schweiz Monatsschr Zahnheilkd. 1980;90:867–80. Article in German.
3. Parkhose RC. A cephalometric appraisal of cases of Angle's Class II, division 1 malocclusion treated by the Andresen appliance. Trans Br Soc Study Orthod 1969;55:61–70.
4. Lucchese A, Carinci F, Brunelli G. Skeletal effects induced by twin block in therapy of class II malocclusion. Eur J Inflamm; 2012;10:83–87.

The only study (Lucchese et al. 2012) for which the abstract could be retrieved examined the skeletal effects of the Twin-Block appliance treatment in pubertal subjects, with findings similar to those of the other investigations included herein.

doi:10.1371/journal.pone.0141198.t004

Table 5. Protocols of the studies included in the present systematic review.

| Study                        | Study design | Sample size; age in yrs as mean±SD (or range) | Appliance  | Class II description                                                                    | Skeletal maturation method/stages  | Prognostic or other features                    | Cephalometric magnification factor | Treatment or observation duration/ Appliance wear | Mandibular advancement /treatment stopped                                                                                                                                           |
|------------------------------|--------------|-----------------------------------------------|------------|-----------------------------------------------------------------------------------------|------------------------------------|-------------------------------------------------|------------------------------------|---------------------------------------------------|-------------------------------------------------------------------------------------------------------------------------------------------------------------------------------------|
| <b>Pre-pubertal subjects</b> |              |                                               |            |                                                                                         |                                    |                                                 |                                    |                                                   |                                                                                                                                                                                     |
| Tulloch et al. [33]          | RCT          | 23 F; 30 M; 9.4 ±1.0                          | Bionator   | Overjet>7 mm                                                                            | HWM/ at least 1 year pre-peak      | All permanent incisors and first molars erupted | NA                                 | 1.3 yrs/ NA                                       | 4–6 mm mandibular advancement with minimal vertical opening/ At 15 months (and continued if clinical objectives were not achieved)                                                  |
|                              |              | 26 F;35 M; 9.4 ±1.2                           | Control    |                                                                                         |                                    |                                                 |                                    | 1.3 yrs/ —                                        |                                                                                                                                                                                     |
| Baccetti et al. [34]         | CCT, R       | 11 F; 10 M; 9.0 ±0.9                          | Twin-Block | Full Class II molar relationship                                                        | CVM/ CS 1 to 2                     | NA                                              | 0%                                 | 1.2 ±0.3 yrs/ Full time                           | Mandibular advancement to an incisor end-to-end (except for patients with overjet>7 mm in whom 4–6 mm initial advancement was performed) with 5–7 mm vertical posterior opening/ NA |
|                              |              | 7 F; 9 M; 9.1 ±0.8                            | Control    |                                                                                         |                                    |                                                 |                                    | 1.3 ±0.6 yrs/ —                                   |                                                                                                                                                                                     |
| Faltin et al. [35]           | CCT, R       | 7 F; 6 M; 9.7 ±1.3                            | Bionator   | Full Class II molar relationship                                                        | CVM/ CS 1 to 2 at end of treatment | NA                                              | 0%                                 | 1.8 ±0.6 yrs/ NA                                  | NA                                                                                                                                                                                  |
|                              |              | 5 F; 6M; 9.4±1.3                              | Control    |                                                                                         | CVM/ CS 1 to 2                     |                                                 |                                    | 2.1 ±0.6 yrs/ —                                   |                                                                                                                                                                                     |
| O'Brien et al. [36]          | RCT          | 41 F; 48 M; 9.7 ±0.98                         | Twin-Block | Overjet >7 mm                                                                           | CVM/ pre-peak                      | NA                                              | 0%                                 | 1.25 yrs/ Full time                               | 7–8 mm mandibular advancement/ When overjet was fully reduced                                                                                                                       |
|                              |              | 39 F; 46 M; 9.8 ±0.94                         | Control    |                                                                                         |                                    |                                                 |                                    | 1.25 yrs/ —                                       |                                                                                                                                                                                     |
| Almeida-Pedrin et al. [38]   | CCT, P       | 15 F; 15M; 10.35 (8.2–11.0)                   | Bionator   | Class II/1; bilateral molar Class II relationship greater than one-half cusp; ANB ≥4.5° | CVM/ CS 1 to 2                     | NA                                              | 9%                                 | 1.52 yrs/ NA                                      | NA                                                                                                                                                                                  |
|                              |              | 15 F; 15M; 10.0 (8.0–10.9)                    | Control    |                                                                                         |                                    |                                                 |                                    | 1.49 yrs/ —                                       |                                                                                                                                                                                     |

(Continued)

Table 5. (Continued)

| Study                    | Study design | Sample size; age in yrs as mean±SD (or range) | Appliance  | Class II description                                                                                                             | Skeletal maturation method/stages  | Prognostic or other features                                                                       | Cephalometric magnification factor | Treatment or observation duration/ Appliance wear | Mandibular advancement /treatment stopped                                                                                                                                                                       |
|--------------------------|--------------|-----------------------------------------------|------------|----------------------------------------------------------------------------------------------------------------------------------|------------------------------------|----------------------------------------------------------------------------------------------------|------------------------------------|---------------------------------------------------|-----------------------------------------------------------------------------------------------------------------------------------------------------------------------------------------------------------------|
| Singh et al. [40]        | CCT, R       | 5 (NA); NA                                    | Twin-Block | Class II/1; Full Class II molar relationship on one side and end-on or greater on the other side; retrognathic mandible; ANB >4° | CVM/ CS 1 to 2                     | Normal maxillary position; normal to horizontal growth pattern with little or no vertical problems | 0%                                 | 1 yr, a/ Full time                                | Mandibular advancement of 10 mm with the interincisal clearance of 2 mm (except for patients with overjet>10 mm in whom 7–8 mm initial advancement was performed, then a second activation), a/ NA              |
|                          |              | 5 (NA); NA                                    | Control    |                                                                                                                                  |                                    |                                                                                                    |                                    | 2 yrs/ —                                          |                                                                                                                                                                                                                 |
| Perillo et al. [43]      | CCT, R       | 9 F; 8 M, a; 8.9±1.1                          | FR-2       | Class II/1; Full or half-cusp Class II molar relationship; overjet >4 mm; ANB >4°; SNB <78°                                      | MPM/ MPS 1 to 2                    | No maxillary protrusion                                                                            | 8%                                 | 1.6 ± 0.8 yrs/ 18 h per day                       | Mandibular advancement less than 3 mm/ At full Class I molar relationship                                                                                                                                       |
|                          |              | 10 F; 7 M, a; 8.9±1.8                         | Control    |                                                                                                                                  |                                    |                                                                                                    |                                    | 1.6 ± 0.8 yrs/ —                                  |                                                                                                                                                                                                                 |
| <b>Pubertal subjects</b> |              |                                               |            |                                                                                                                                  |                                    |                                                                                                    |                                    |                                                   |                                                                                                                                                                                                                 |
| Baccetti et al. [34]     | CCT, R       | 6 F; 9 M; 12.9 ±1.2                           | Twin-Block | Full Class II molar relationship                                                                                                 | CVM/ CS 3 to 5                     | NA                                                                                                 | 0%                                 | 1.4 ±0.4 yrs/ Full time                           | Mandibular advancement to an incisor end-to-end (except for patients with overjet>7 mm in whom 4–6 mm initial advancement was performed, then a second activation). Also, 5–7 mm vertical posterior opening/ NA |
|                          |              | 7 F; 7 M; 13.6 ±1.2                           | Control    |                                                                                                                                  |                                    |                                                                                                    |                                    | 1.3 ±0.4 yrs/ —                                   |                                                                                                                                                                                                                 |
| Faltin et al. [35]       | CCT, R       | 6 F; 4 M; 10.8 ±1.7                           | Bionator   | Full Class II molar relationship                                                                                                 | CVM/ CS 3 or 4 at end of treatment | NA                                                                                                 | 0%                                 | 2.3 ±1.5 yrs/ NA                                  | NA                                                                                                                                                                                                              |
|                          |              | 5 F; 5 M; 11.2 ±1.5                           | Control    |                                                                                                                                  |                                    |                                                                                                    |                                    | 1.8 ±0.7 yrs/ —                                   |                                                                                                                                                                                                                 |

(Continued)

Table 5. (Continued)

| Study                       | Study design | Sample size; age in yrs as mean±SD (or range) | Appliance           | Class II description                                                                                                             | Skeletal maturation method/stages                          | Prognostic or other features                                                                       | Cephalometric magnification factor | Treatment or observation duration/ Appliance wear | Mandibular advancement /treatment stopped                                                                                                                                                          |
|-----------------------------|--------------|-----------------------------------------------|---------------------|----------------------------------------------------------------------------------------------------------------------------------|------------------------------------------------------------|----------------------------------------------------------------------------------------------------|------------------------------------|---------------------------------------------------|----------------------------------------------------------------------------------------------------------------------------------------------------------------------------------------------------|
| Quintão et al. [37]         | CCT, P       | 7 F; 12 M; 9.5 ±0.8                           | Twin Block          | Class II/1 with distal canine and molar relationship; ANB > 4 degrees; overjet ≥ 6 mm                                            | Epiphyseal stages FP, FM, G1 and Psi                       | NA                                                                                                 | NA                                 | 1.0±0.08 yrs/ full time                           | 4 mm mandibular advancement with re-activation after 6 months if needed/ After 12 months                                                                                                           |
|                             |              | 7 F; 12 M; 9.9 ±1.1                           | Control             |                                                                                                                                  |                                                            |                                                                                                    |                                    | 1.0±0.08 yrs/ —                                   |                                                                                                                                                                                                    |
| Cui et al. [39]             | CCT, R       | 9 F; 18 M; 11.7 (NA)                          | Twin Block          | Class II/1; distal molar relationship; overjet ≥4 mm; ANB ≥5°                                                                    | HWM/ NA                                                    | Deep bite                                                                                          | NA                                 | 1.2 yrs/ NA                                       | NA                                                                                                                                                                                                 |
|                             |              | 9 F; 12 M; 11.3 (NA)                          | Control             |                                                                                                                                  |                                                            |                                                                                                    |                                    | 1.2 yrs/ —                                        |                                                                                                                                                                                                    |
| Singh et al. [40]           | CCT, R       | 29 (NA); NA                                   | Twin-Block          | Class II/1; full Class II molar relationship on one side and end-on or greater on the other side; retrognathic mandible; ANB >4° | CVM/ CS 3 to 4                                             | Normal maxillary position; normal to horizontal growth pattern with little or no vertical problems | 0%                                 | 1 yr, a/ Full time                                | Mandibular advancement of 10 mm with the interincisal clearance of 2 mm (except for patients with overjet>10 mm in whom 7–8 mm initial advancement was performed, then a second activation), a /NA |
|                             |              | 29 (NA); NA                                   | Control             |                                                                                                                                  |                                                            |                                                                                                    |                                    | 2 yrs/ —                                          |                                                                                                                                                                                                    |
| Martina et al. [42]         | RCT          | 8 F; 15 M; 10.9 ±1.3                          | Sander Bite Jumping | Full Class II molar relationship; overjet ≥6 mm                                                                                  | CVM/ CS 3                                                  | SN-MP angle smaller than normal value ±SD                                                          | 0%                                 | 1.5 yrs/ 14h per day                              | Initial 4 mm mandibular advancement followed by individual 1.5 mm advancements/ At full Class I molar relationship; maximum treatment duration set at 1.5 yrs                                      |
|                             |              | 12 F; 11 M; 10.5 ±1.2                         | Control             |                                                                                                                                  |                                                            |                                                                                                    |                                    | 1 yr/—                                            |                                                                                                                                                                                                    |
| Baysal and Uysal [41], [44] | CCT, P       | 10 F, 10 M; 13.0 ±1.3                         | Twin Block          | SNB <78°; ANB >4°; overjet ≥5 mm; bilateral molar Class II relationship (at least 3.5 mm)                                        | HWM/ Fourth (S and H2) or fifth (MP3cap) epiphyseal stages | SN-GoGn angle of 32° ±6°                                                                           | 14%, a                             | 1.3 ±0.6/ Full time                               | Mandibular advancement by 70% of the maximum protrusive path, then a second activation/ At normal or overcorrected overjet                                                                         |

(Continued)



Table 5. (Continued)

| Study | Study design | Sample size; age in yrs as mean±SD (or range) | Appliance | Class II description | Skeletal maturation method/stages | Prognostic or other features | Cephalometric magnification factor | Treatment or observation duration/ Appliance wear | Mandibular advancement /treatment stopped |
|-------|--------------|-----------------------------------------------|-----------|----------------------|-----------------------------------|------------------------------|------------------------------------|---------------------------------------------------|-------------------------------------------|
|       |              | 9 F, 11 M; 12.2 ±1.5                          | Control   |                      |                                   |                              |                                    | 1.3 ±0.3 yrs/<br>—                                |                                           |

RCT, randomized clinical trial; CCT, controlled clinical trial; P, prospective; R, retrospective; NA, not available; F, females; M, males; CVM, cervical vertebral maturation; CS, CVM stage; HWM, hand-and-wrist maturation; MP3cap, medial phalanx capping stage of the third finger; FMA, Frankfurt/mandibular plane angle; MP, mandibular plane.

a, information provided by the Authors; —, not applicable.

doi:10.1371/journal.pone.0141198.t005

### Main results

Main results in the included studies are summarised in Table 6. On pre-pubertal patients, 1 RCT and 1 CCT reported improvement in 75% [33] and 65% [43] of the cases. Another study on pubertal patients reported a 100% success rate [41], [44], while in the rest of the studies the treatment success rate was not reported. Significant skeletal effects were reported mainly in the studies including pubertal subjects, even though 3 studies including pre-pubertal subjects reported a significant increase of mandibular length [33], [34], or growth modification at the maxillary level [36] that would be of poor clinical meaning. On the contrary, 3 studies including pre-pubertal subjects reported no skeletal effects [35], [40], [43]. All the studies including pubertal subjects reported a significant increase of mandibular length [34], [35], [37], [39–42], [44], an opening of the gonial angle [34], [35], an increase of lower anterior facial height [40], [41], [44], and maxillary growth restrain [41], [44]. Regardless of the growth phase, dentoalveolar effects were generally seen. Six studies [33–36], [40], [43] on pre-pubertal patients concluded that treatment had no or minimal skeletal effects. On the contrary, 6 studies including pubertal patients reported that optimal timing for functional treatment would be during or slightly after the pubertal growth spurt [34], [35], [37], [40], [42]. Finally, 2 studies on pre-pubertal [38] and pubertal patients [41], [44] did not comment on treatment timing. At the mandibular level, these effects were reported as mesial movement of the mandibular dentition [34–36], [38], [40], extrusion of lower first molars [38], and proclination of lower incisors [34], [38], [39], [42]. At the maxillary level, dentoalveolar treatment effects as reclination of upper incisors were reported both in pre-pubertal [43] and pubertal patients [37–40], [42]. One study [34] reported distal movement of the maxillary dentition, and a further study [40] reported absence of any dentoalveolar treatment effects for the pre-pubertal subjects. The rest of the studies did not report information about dentoalveolar effects at the maxillary level. Modifications of the soft tissue profile were described in only 4 studies [37], [39–41], [44] on pubertal patient as improvement of the profile, mainly due to soft tissue Pogonion advancement [37], [40], [41], [44], upper lip retraction [37], [39], or lower lip protraction [40] were also reported. On the contrary, 1 study [40] including pre-pubertal subjects reported no significant soft tissue changes.

**Table 6. Treatment effects in the studies included in the present systematic review.**

| Study                        | Success rate, a    | Main treatment effects                                                                                      |                                                                                                                                                                 |                                                                      | Conclusions on growth phase and treatment efficiency                                                                                                                                |
|------------------------------|--------------------|-------------------------------------------------------------------------------------------------------------|-----------------------------------------------------------------------------------------------------------------------------------------------------------------|----------------------------------------------------------------------|-------------------------------------------------------------------------------------------------------------------------------------------------------------------------------------|
|                              |                    | Skeletal                                                                                                    | Dentoalveolar                                                                                                                                                   | Soft tissues                                                         |                                                                                                                                                                                     |
| <b>Pre-pubertal subjects</b> |                    |                                                                                                             |                                                                                                                                                                 |                                                                      |                                                                                                                                                                                     |
| Tulloch et al. [33]          | 75% improved cases | Significant increase in mandibular length and protrusion                                                    | Overjet and overbite reduction                                                                                                                                  | NA                                                                   | Early functional treatment reduces the severity of Class II skeletal pattern. Children with Class II malocclusion experience considerable variation in growth                       |
| Baccetti et al. [34]         | NA                 | Significant mandibular length increase and significant opening of gonial angle                              | Overjet reduction, mesial movement of maxillary and distal movement of mandibular molars, mandibular incisor proclination                                       | NA                                                                   | Optimal timing for functional treatment appears to be during or slightly after the onset of the pubertal peak                                                                       |
| Faltin et al. [35]           | NA                 | No significant skeletal effects                                                                             | Significant overjet reduction and correction of molar relationship                                                                                              | NA                                                                   | No significant skeletal effects of functional treatment performed during the pre-pubertal growth phase                                                                              |
| O'Brien et al. [36]          | NA                 | Significant skeletal growth modification at maxillary and mandibular level, however not clinically relevant | Overjet reduction and correction of molar relationship                                                                                                          | NA                                                                   | Early functional treatment reduces overjet in Class II malocclusion patients mainly due to dentoalveolar changes, with clinically insignificant skeletal effects                    |
| Almeida-Pedrin et al. [38]   | NA                 | Significant increase in mandibular protrusion, but not in mandibular length                                 | Significant maxillary incisor retrusion and reclination, and mandibular incisor protrusion and proclination, extrusion and mesial movement of mandibular molars | NA                                                                   | None                                                                                                                                                                                |
| Singh et al. [40]            | NA                 | No significant skeletal effects                                                                             | No significant dental effects                                                                                                                                   | No significant soft tissue effects                                   | Optimal timing for functional treatment would be during or slightly after the pubertal growth spurt                                                                                 |
| Perillo et al. [43]          | 65%, b             | No significant skeletal effects, except for ANB angle reduction                                             | Significant overjet reduction, maxillary incisor reclination                                                                                                    | NA                                                                   | Treatment at the pre-pubertal growth phase has no mandibular effects                                                                                                                |
| <b>Pubertal subjects</b>     |                    |                                                                                                             |                                                                                                                                                                 |                                                                      |                                                                                                                                                                                     |
| Baccetti et al. [34]         | NA                 | Significant mandibular length increase and significant opening of gonial angle                              | Overjet reduction, mesial movement of maxillary and distal movement of mandibular molars, mandibular incisor proclination                                       | NA                                                                   | Optimal timing for functional treatment appears to be during or slightly after the onset of the pubertal peak                                                                       |
| Faltin et al. [35]           | NA                 | Significant increase in mandibular length and ramus height with opening of the gonial angle                 | Significant overjet reduction and correction of molar relationship with mesial movement of the mandibular dentition                                             | NA                                                                   | Optimal timing to start functional treatment is immediately before the pubertal growth spurt.                                                                                       |
| Quintão et al. [37]          | NA                 | Significant increase of mandibular length and ANB reduction                                                 | Upper incisor reclination and overjet reduction                                                                                                                 | Upper lip retraction and forward advancement of soft tissue Pogonion | A relevant degree of skeletal correction could be obtained at pubertal stage of development. However, an extended growth period would be needed for a complete Class II correction. |
| Cui et al. [39]              | NA                 | Significant increase in mandibular length                                                                   | Significant overjet reduction, maxillary incisor reclination, lower incisor proclination                                                                        | Upper lip retraction and reduction of mentolabial sulcus angle       | Functional treatment for Class II malocclusion at the pubertal growth spurt improves relationship of basal bones                                                                    |

(Continued)

Table 6. (Continued)

| Study                       | Success rate, a | Main treatment effects                                                                                                                |                                                                                                                               |                                                               | Conclusions on growth phase and treatment efficiency                                                                    |
|-----------------------------|-----------------|---------------------------------------------------------------------------------------------------------------------------------------|-------------------------------------------------------------------------------------------------------------------------------|---------------------------------------------------------------|-------------------------------------------------------------------------------------------------------------------------|
|                             |                 | Skeletal                                                                                                                              | Dentoalveolar                                                                                                                 | Soft tissues                                                  |                                                                                                                         |
| Singh et al. [40]           | NA              | Significant increase in mandibular protrusion and length; significant increase in lower anterior facial height                        | Significant overjet and overbite reduction; maxillary incisor reclination, extrusion and mesial movement of mandibular molars | Significant advancement of lower lip and soft tissue Pogonion | Optimal timing for functional treatment of Class II malocclusion is during or slightly after the pubertal growth spurt. |
| Martina et al. [42]         | NA              | Significant increase in mandibular length                                                                                             | Significant overjet reduction, maxillary incisor reclination and mandibular incisor proclination                              |                                                               | Treatment response was relevant and not influenced by the cervical stage (3 or 4) among pubertal subjects               |
| Baysal and Uysal [41], [44] | 100%            | Increase in composite mandibular length, maxillary growth restrain, significant increase in lower anterior and posterior face heights | Overjet reduction                                                                                                             | Significant advancement of soft tissue Pogonion and lower lip | None                                                                                                                    |

NA, not available

a, as defined by the authors

b, information provided by the Authors.

doi:10.1371/journal.pone.0141198.t006

### Risk of bias in individual studies

Detailed information on the risk of bias in individual studies is shown in Tables 7 and 8 for the RCTs and CCTs, respectively. Briefly, 2 RCTs [33], [36] had an unclear bias with regard to the diagnosis of Class II malocclusion based on the overjet alone, while the last RCT [42] did not show significant risk of bias. Regarding the CCTs, the overall scores ranged from 12 [40] to 24 [41], [43], [44]. Only 1 study had an overall score below the threshold and was thus judged as affected by significant risk of bias [40], two studies [37], [39] reached 15 points, 1 study [38] reached 16 points, 1 study [35] reached 19 points, and the last 1 study [34] reached 20 points.

### Sensitivity analysis

Sensitivity analysis is detailed in Table 9. Generally, overall effects proved to be robust enough except for the study with higher risk of bias [40]. Given the results of the sensitivity analysis

Table 7. Risk of bias for the randomised clinical trials according to the Cochrane tool.

| Study               | Random sequence generation (selection bias) | Allocation concealment (selection bias) | Blinding of personnel (performance bias), a | Blinding of outcome assessment (detection bias) | Incomplete outcome data (attrition bias) | Selective reporting (reporting bias) | Other bias | Overall risk of bias |
|---------------------|---------------------------------------------|-----------------------------------------|---------------------------------------------|-------------------------------------------------|------------------------------------------|--------------------------------------|------------|----------------------|
| Tulloch et al. [33] | Low                                         | Unclear                                 | Low                                         | Unclear                                         | Low                                      | Low                                  | Unclear, b | Unclear              |
| O'Brien et al. [36] | Low                                         | Low                                     | Low                                         | Low                                             | Low                                      | Low                                  | Unclear, b | Unclear              |
| Martina et al. [42] | Low                                         | Low                                     | Low                                         | Low                                             | Low                                      | Low                                  | Low        | Low                  |

a, Even if not feasible, the risk of bias for non-blinded personnel performing the treatment was not judged as a significant risk of bias

b, Class II malocclusion determined only by overjet.

doi:10.1371/journal.pone.0141198.t007

**Table 8. Risk of bias for the controlled clinical trials according to the modified Downs and Black tool.**

| Item                                                                                                                                          | Baccetti et al. [34] | Faltin et al. [35] | Quintão et al. [37] | Almeida-Pedrin et al. [38] | Cui et al. [39] | Singh et al. [40] | Baysal and Uysal [41], [44] | Perillo et al. [43] |
|-----------------------------------------------------------------------------------------------------------------------------------------------|----------------------|--------------------|---------------------|----------------------------|-----------------|-------------------|-----------------------------|---------------------|
| <b>Reporting</b>                                                                                                                              |                      |                    |                     |                            |                 |                   |                             |                     |
| 1. Is the objective of the study clearly described?                                                                                           | Yes                  | Yes                | Yes                 | Yes                        | Yes             | Yes               | Yes                         | Yes                 |
| 2. Are the main outcomes to be measured clearly described in the Introduction or Methods section (including cephalometric magnification)?     | Yes                  | Yes                | No                  | Yes                        | Yes             | Yes               | Yes                         | Yes                 |
| 3. Were inclusion and exclusion criteria clearly stated?                                                                                      | Yes                  | Yes                | No                  | No                         | No              | Yes               | Yes                         | Yes                 |
| 4. Are the characteristics of the patients included clearly described?                                                                        | Yes                  | No                 | Yes                 | Yes                        | No              | No                | Yes                         | Yes                 |
| 5. Is the Class II malocclusion fully described?                                                                                              | No                   | No                 | Yes                 | Yes                        | Yes             | Yes               | Yes                         | Yes                 |
| 6. Are the interventions of interest clearly described?                                                                                       | Yes                  | No                 | Yes                 | No                         | No              | No                | Yes                         | Yes                 |
| 7. Are the distributors of principal confounders in each group of subjects to be compared clearly described?                                  | Yes                  | Yes                | Partially           | Partially                  | Partially       | No                | Yes                         | Yes                 |
| 8. Are the main findings of the study clearly described?                                                                                      | Yes                  | Yes                | Yes                 | Yes                        | Yes             | Yes               | Yes                         | Yes                 |
| 9. Does the study provide estimates of the random variability in the data for the main outcomes?                                              | Yes                  | Yes                | Yes                 | Yes                        | Yes             | Yes               | Yes                         | Yes                 |
| 10. Have all important adverse events that may be a consequence of functional appliances been reported?                                       | Yes                  | Yes                | Yes                 | Yes                        | Yes             | Yes               | Yes                         | Yes                 |
| 11. Have the characteristics of patients lost to follow-up been described?                                                                    | Yes                  | Yes                | Yes                 | Yes                        | Yes             | Yes               | Yes                         | Yes                 |
| 12. Have actual probability values been reported for the main outcomes except where the probability value is less than 0.001?                 | No                   | No                 | No                  | No                         | Yes             | No                | Yes                         | No                  |
| <b>External validity</b>                                                                                                                      |                      |                    |                     |                            |                 |                   |                             |                     |
| 13. Were the patients asked to participate in the study representative of the entire population from which they were recruited?               | Yes                  | Yes                | Unclear             | Unclear                    | Unclear         | Unclear           | Yes                         | Yes                 |
| 14. Were those subjects who were prepared to participate representative of the entire population from which they were recruited?              | Unclear              | Unclear            | Unclear             | Unclear                    | Unclear         | Unclear           | Yes                         | Yes                 |
| 15. Were the staff, places, and facilities where the patients were treated, representative of the treatment the majority of patients receive? | Yes                  | Yes                | Yes                 | Yes                        | Yes             | Yes               | Yes                         | Yes                 |
| <b>Internal validity—bias</b>                                                                                                                 |                      |                    |                     |                            |                 |                   |                             |                     |
| 16. Was an attempt made to blind those measuring the main outcome of the intervention?                                                        | No                   | No                 | Unclear             | Unclear                    | Yes             | Yes               | Unclear                     | Yes                 |
| 17. If any of the results of the study were based on “data dredging”, was that made clear?                                                    | Yes                  | Yes                | Yes                 | Yes                        | Yes             | Unclear           | Yes                         | Yes                 |
| 18. Do the analyses adjust for different lengths of follow-up of patients?                                                                    | Yes                  | Yes                | Unclear             | Yes                        | Yes             | No                | Yes                         | Yes                 |
| 19. Were the statistical tests used to assess the main outcomes appropriate?                                                                  | Yes                  | Yes                | No                  | No                         | No              | Unclear           | Yes                         | Yes                 |
| 20. Was compliance with the intervention, i.e. appliance wear, reliable?                                                                      | Yes                  | Yes                | Unclear             | Unclear                    | Unclear         | Yes               | Yes                         | Yes                 |
| 21. Was the skeletal maturation staging assessment accurate (valid and reliable)?                                                             | Yes                  | Yes                | Unclear             | Unclear                    | Unclear         | Unclear           | Unclear                     | No                  |
| 22. Were the main outcomes measures used accurate (valid and reliable)?                                                                       | Yes                  | Yes                | Yes                 | Yes                        | Unclear         | Unclear           | Yes                         | Yes                 |
| <b>Internal validity—confounding</b>                                                                                                          |                      |                    |                     |                            |                 |                   |                             |                     |
| 23. Were the patients in different intervention groups recruited from the same population?                                                    | No                   | No                 | Yes                 | Yes                        | No              | Unclear           | Unclear                     | Yes                 |
| 24. Were the baseline characteristics comparable?                                                                                             | Yes                  | Yes                | Yes                 | Yes                        | Yes             | Unclear           | Yes                         | Yes                 |

(Continued)

Table 8. (Continued)

| Item                                                                                                       | Baccetti et al. [34] | Faltin et al. [35] | Quintão et al. [37] | Almeida-Pedrin et al. [38] | Cui et al. [39] | Singh et al. [40] | Baysal and Uysal [41], [44] | Perillo et al. [43] |
|------------------------------------------------------------------------------------------------------------|----------------------|--------------------|---------------------|----------------------------|-----------------|-------------------|-----------------------------|---------------------|
| 25. Were study subjects in different intervention groups recruited over the same period of time?           | No                   | No                 | Unclear             | No                         | Unclear         | Unclear           | Unclear                     | No                  |
| 26. Was there adequate adjustment for confounding in the analyses from which the main findings were drawn? | No                   | No                 | No                  | No                         | No              | No                | No                          | No                  |
| 27. Were losses of patients to follow-up taken into account?                                               | Yes                  | Yes                | Yes                 | Yes                        | Yes             | Yes               | Yes                         | Yes                 |
| <b>Power</b>                                                                                               |                      |                    |                     |                            |                 |                   |                             |                     |
| 28. Prior estimate of sample size                                                                          | No                   | No                 | No                  | No                         | No              | No                | Yes                         | Yes                 |
| <b>Total</b>                                                                                               | <b>20</b>            | <b>19</b>          | <b>15</b>           | <b>16</b>                  | <b>15</b>       | <b>12</b>         | <b>24</b>                   | <b>24</b>           |

doi:10.1371/journal.pone.0141198.t008

combined with the overall risk of bias, 1 CCT [40] was excluded from the meta-analyses and GRADE assessment reported below. One study [40] uncovered a relevant effect at the sensitivity analysis. Regarding the pubertal subgroup, the overall (for all studies) total mandibular length and mandibular ramus showed about 0.8 mm difference with the corresponding values without the study with the highest risk of bias assessment [40]. Similarly, clinically relevant effects were seen when removing the same study [40] for the ANB angle and facial divergence. Of note the mandibular incisor proclination also yielded some different estimations between all the studies when a RCT [42] was removed.

### Risk of bias among studies

Heterogeneity at the subgroup level was generally low, with  $I^2$  values between 0% and 56% for all the primary outcomes (Figs 2–5). On the contrary, substantial heterogeneity was seen for the SNA, SNB, ANB angles with  $I^2$  values up to 88% (ANB angle, pubertal subgroup) as shown in Figs 6–8. The maxillary base (Pancherz Analysis) and facial divergence showed no or acceptable heterogeneity with  $I^2$  values equal to 0 in both subgroups (Fig 9) or not exceeding 55% (Fig 10), respectively. Finally, lower incisor proclination also showed acceptable heterogeneity with  $I^2$  values not exceeding 47% in both subgroups (Fig 11). Results on the publication bias analyses are shown in Table 10. Generally non-significant p values were seen for all the parameters in both subgroups. Exception were seen for the SNB and ANB angles that yielded a significant publication bias according to the Egger test in the pubertal subgroup ( $p = 0.020$  and  $p = 0.056$ , respectively), for the ANB for the pre-pubertal subgroup ( $p = 0.055$ ), and for the facial divergence for the pre-pubertal subgroup ( $p = 0.089$ ).

### Meta-analysis for the primary outcomes

The cephalometric measurements used in each study and pooled herein for the meta-analysis are reported in Table 11. Detailed results for the meta-analysis for the primary outcomes are shown in Figs 2–5. Overall effects are expressed as mean (95% confidence interval) with 90% prediction intervals summarised in Table 12. For the total mandibular length, no study made use of the Articulare as the endpoint. The overall annualised changes were 0.95 mm (0.38, 1.51) and 2.91 mm (2.04, 3.79) in the pre-pubertal and pubertal subgroups, respectively. The difference between the subgroups was significant at  $p < 0.01$  (Fig 2). The prediction intervals of the annualised changes ranged from -0.30 to 2.20 mm and from 1.04 to 4.78 mm in the pre-pubertal and pubertal subgroups, respectively. Regarding the mandibular ramus height, the overall annualised change in pre-pubertal patients was 0.00 mm (-0.52, 0.53). While in pubertal

**Table 9. Results of the sensitivity analyses for each of the included parameter according to the pre-pubertal and pubertal subgroups.**

| Variable                     | Subgroup                     | Removed study                    | Mean Difference [95% CI]    |                            |                     |
|------------------------------|------------------------------|----------------------------------|-----------------------------|----------------------------|---------------------|
| Total mandibular length (mm) | Pre-pubertal                 | Tulloch et al. [33]              | 0.71 [0.18, 1.23]           |                            |                     |
|                              |                              | Baccetti et al. [34]             | 0.97 [0.60, 1.34]           |                            |                     |
|                              |                              | Faltin et al. [35]               | 1.08 [0.71, 1.46]           |                            |                     |
|                              |                              | Almeida-Pedrin et al. [38]       | 1.12 [0.74, 1.51]           |                            |                     |
|                              |                              | Singh et al. [40]                | 1.05 [0.69, 1.41]           |                            |                     |
|                              |                              | Perillo et al. [43]              | 1.17 [0.79, 1.55]           |                            |                     |
|                              |                              | <b>All studies</b>               | <b>1.04 [0.69, 1.4]</b>     |                            |                     |
|                              |                              | Pubertal                         | Baccetti et al. [34]        | 3.67 [3.17, 4.16]          |                     |
|                              | Faltin et al. [35]           |                                  | 3.87 [3.40, 4.35]           |                            |                     |
|                              | Quintão et al. [37]          |                                  | 3.88 [3.40, 4.36]           |                            |                     |
|                              | Cui et al. [39]              |                                  | 3.91 [3.42, 4.40]           |                            |                     |
|                              | Singh et al. [40]            |                                  | 2.95 [2.33, 3.57], <b>a</b> |                            |                     |
|                              | Baysal and Uysal [41], [44]  |                                  | 4.05 [3.55, 4.55]           |                            |                     |
|                              | Martina et al. [42]          |                                  | 3.91 [3.42, 4.41]           |                            |                     |
|                              | <b>All studies</b>           |                                  | <b>3.8 [3.33, 4.26]</b>     |                            |                     |
|                              | Mandibular ramus height (mm) | Pre-pubertal                     | Baccetti et al. [34]        | -0.06 [-0.65, 0.52]        |                     |
| Faltin et al. [35]           |                              |                                  | 0.00 [-0.58, 0.58]          |                            |                     |
| Singh et al. [40]            |                              |                                  | 0.00 [-0.52, 0.52]          |                            |                     |
| Perillo et al. [43]          |                              |                                  | 0.21 [-0.43, 0.85]          |                            |                     |
| <b>All studies</b>           |                              |                                  | <b>0.03 [-0.47, 0.53]</b>   |                            |                     |
| Pubertal                     |                              |                                  | Baccetti et al. [34]        | 2.91 [2.44, 3.39]          |                     |
|                              |                              | Faltin et al. [35]               | 2.95 [2.48, 3.41]           |                            |                     |
|                              |                              | Singh et al. [40]                | 2.17 [1.50, 2.84], <b>a</b> |                            |                     |
|                              |                              | Baysal and Uysal [41], [44]      | 3.07 [2.57, 3.57]           |                            |                     |
|                              |                              | Martina et al. [42]              | 3.02 [2.56, 3.49]           |                            |                     |
|                              |                              | <b>All studies</b>               | <b>2.90 [2.45, 3.34]</b>    |                            |                     |
|                              |                              | Composite mandibular length (mm) | Pre-pubertal                | Baccetti et al. [34]       | 0.94 [0.18, 1.69]   |
|                              |                              |                                  |                             | Faltin et al. [35]         | 1.21 [0.41, 2.01]   |
|                              |                              |                                  |                             | O'Brien et al. [36]        | 0.47 [-0.69, 1.63]  |
|                              |                              |                                  | <b>All studies</b>          | <b>0.96 [0.25, 1.66]</b>   |                     |
| Pubertal                     |                              |                                  | Baccetti et al. [34]        | 1.77 [1.00, 2.55]          |                     |
|                              | Faltin et al. [35]           |                                  | 2.36 [1.62, 3.10]           |                            |                     |
|                              | Baysal and Uysal [41], [44]  | 2.42 [1.59, 3.25]                |                             |                            |                     |
| Mandibular base (mm)         | Pre-pubertal                 | Baccetti et al. [34]             | 0.77 [0.10, 1.44]           |                            |                     |
|                              |                              | Faltin et al. [35]               | 1.00 [0.28, 1.71]           |                            |                     |
|                              |                              | O'Brien et al. [36]              | 1.22 [0.07, 2.38]           |                            |                     |
|                              |                              | <b>All studies</b>               | <b>0.93 [0.29, 1.56]</b>    |                            |                     |
|                              |                              | Pubertal                         | Baccetti et al. [34]        | 1.51 [0.94, 2.07]          |                     |
|                              |                              |                                  | Faltin et al. [35]          | 1.75 [1.20, 2.30]          |                     |
|                              | Baysal and Uysal [41], [44]  |                                  | 1.69 [0.96, 2.43]           |                            |                     |
|                              | Martina et al. [42]          |                                  | 1.58 [0.93, 2.24]           |                            |                     |
|                              | <b>All studies</b>           |                                  | <b>1.63 [1.10, 2.16]</b>    |                            |                     |
|                              | SNA angle (°)                |                                  | Pre-pubertal                | Tulloch et al. [33]        | 0.02 [-0.30, 0.340] |
|                              |                              |                                  |                             | Almeida-Pedrin et al. [38] | -0.14 [-0.49, 0.20] |
|                              |                              |                                  |                             | Singh et al. [40]          | -0.02 [-0.29, 0.25] |

(Continued)



Table 9. (Continued)

| Variable              | Subgroup     | Removed study               | Mean Difference [95% CI]    |
|-----------------------|--------------|-----------------------------|-----------------------------|
|                       |              | Perillo et al. [43]         | -0.03 [-0.33, 0.26]         |
|                       |              | <b>All studies</b>          | <b>-0.04 [-0.30, 0.22]</b>  |
|                       | Pubertal     | Quintão et al. [37]         | -0.42 [-0.73, -0.11]        |
|                       |              | Cui et al. [39]             | -0.49 [-0.81, -0.18]        |
|                       |              | Singh et al. [40]           | -0.63 [-0.98, -0.28]        |
|                       |              | Baysal and Uysal [41], [44] | -0.16 [-0.59, 0.27]         |
|                       |              | <b>All studies</b>          | <b>-0.45 [-0.75, -0.16]</b> |
| SNB angle (°)         | Pre-pubertal | Tulloch et al. [33]         | 0.49 [0.19, 0.79]           |
|                       |              | Almeida-Pedrin et al. [38]  | 0.43 [0.17, 0.69]           |
|                       |              | Singh et al. [40]           | 0.58 [0.35, 0.81]           |
|                       |              | Perillo et al. [43]         | 0.70 [0.45, 0.95]           |
|                       |              | <b>All studies</b>          | <b>0.56 [0.33, 0.78]</b>    |
|                       | Pubertal     | Quintão et al. [37]         | 1.92 [1.57, 2.26]           |
|                       |              | Cui et al. [39]             | 2.00 [1.64, 2.37]           |
|                       |              | Singh et al. [40]           | 1.00 [0.60, 1.39], a        |
|                       |              | Baysal and Uysal [41], [44] | 2.09 [1.69, 2.50]           |
|                       |              | <b>All studies</b>          | <b>1.77 [1.44, 2.09]</b>    |
| ANB angle (°)         | Pre-pubertal | Tulloch et al. [33]         | -0.71 [-1.01, -0.42]        |
|                       |              | Almeida-Pedrin et al. [38]  | -0.74 [-1.00, -0.47]        |
|                       |              | Singh et al. [40]           | -0.73 [-0.95, -0.51]        |
|                       |              | Perillo et al. [43]         | -0.76 [-0.99, -0.52]        |
|                       |              | <b>All studies</b>          | <b>-0.73 [-0.95, -0.52]</b> |
|                       | Pubertal     | Quintão et al. [37]         | -2.10 [-2.42, -1.77]        |
|                       |              | Cui et al. [39]             | -2.14 [-2.46, -1.82]        |
|                       |              | Singh et al. [40]           | -1.55 [-1.89, -1.22]        |
|                       |              | Baysal and Uysal [41], [44] | -1.94 [-2.29, -1.58]        |
|                       |              | <b>All studies</b>          | <b>-1.94 [-2.23, -1.65]</b> |
| Maxillary base (mm)   | Pre-pubertal | Baccetti et al. [34]        | -0.72 [-1.11, -0.34]        |
|                       |              | Faltin et al. [35]          | -0.59 [-0.98, -0.19]        |
|                       |              | O'Brien et al. [36]         | -0.47 [-1.10, 0.16]         |
|                       |              | <b>All studies</b>          | <b>-0.63 [-0.98, -0.27]</b> |
|                       | Pubertal     | Baccetti et al. [34]        | -0.46 [-0.84, -0.08]        |
|                       |              | Faltin et al. [35]          | -0.57 [-0.95, -0.20]        |
|                       |              | Baysal and Uysal [41], [44] | -0.33 [-0.85, 0.19]         |
|                       |              | Martina et al. [42]         | -0.52 [-0.89, -0.15]        |
|                       |              | <b>All studies</b>          | <b>-0.49 [-0.84, -0.15]</b> |
| Facial divergence (°) | Pre-pubertal | Baccetti et al. [34]        | 0.04 [-0.30, 0.37]          |
|                       |              | Faltin et al. [35]          | 0.03 [-0.31, 0.37]          |
|                       |              | Almeida-Pedrin et al. [38]  | -0.02 [-0.40, 0.36]         |
|                       |              | Singh et al. [40]           | 0.16 [-0.17, 0.49]          |
|                       |              | Perillo et al. [43]         | 0.38 [-0.02, 0.79]          |
|                       |              | <b>All studies</b>          | <b>0.11 [-0.21, 0.42]</b>   |
|                       | Pubertal     | Baccetti et al. [34]        | 1.54 [1.13, 1.94]           |
|                       |              | Faltin et al. [35]          | 1.58 [1.17, 1.99]           |
|                       |              | Cui et al. [39]             | 1.52 [1.12, 1.93]           |
|                       |              | Singh et al. [40]           | 0.80 [0.33, 1.26], a        |
|                       |              | Baysal and Uysal [41], [44] | 1.66 [1.25, 2.06]           |

(Continued)

Table 9. (Continued)

| Variable                             | Subgroup                  | Removed study               | Mean Difference [95% CI]     |
|--------------------------------------|---------------------------|-----------------------------|------------------------------|
| Mandibular incisors proclination (°) | Pre-pubertal              | Martina et al. [42]         | 1.53 [1.13, 1.93]            |
|                                      |                           | <b>All studies</b>          | <b>1.46 [1.09, 1.84]</b>     |
|                                      |                           | Almeida-Pedrin et al. [38]  | 1.64 [0.02, 3.27]            |
|                                      |                           | Singh et al. [40]           | 1.37 [0.38, 2.36]            |
|                                      |                           | Perillo et al. [43]         | 1.17 [0.02, 2.32]            |
|                                      | Pubertal                  | <b>All studies</b>          | <b>1.35 [0.39, 2.31]</b>     |
|                                      |                           | Cui et al. [39]             | 0.94 [-0.20, 2.08]           |
|                                      |                           | Singh et al. [40]           | 0.72 [-0.32, 1.77]           |
|                                      |                           | Baysal and Uysal [41], [44] | 1.01 [-0.28, 2.30]           |
|                                      |                           | Martina et al. [42]         | 0.17 [-0.95, 1.29], <b>a</b> |
| <b>All studies</b>                   | <b>0.69 [-0.29, 1.68]</b> |                             |                              |

Note of judgments:

**a**, value with clinical relevant difference as compared to the corresponding overall (all studies) mean.

doi:10.1371/journal.pone.0141198.t009

patients, the overall annualised change was 2.18 mm (1.51, 2.86). The difference between the subgroups was significant at  $p < 0.01$  (Fig 3). The prediction intervals of the annualised changes ranged from -1.69 to 1.69 mm and from 1.17 to 3.19 mm in the pre-pubertal and pubertal subgroups, respectively. For the composite mandibular length, the overall annualised change in pre-pubertal patients was 0.94 mm (0.25, 1.63), while in pubertal patients, the overall annualised change was 2.10 mm (1.02, 3.18). The difference between the subgroups was not significant even though the p value was close to significance at 0.08 (Fig 4). The prediction intervals of the annualised changes ranged from -1.28 to 3.16 mm and from -0.78 to 4.98 mm in the pre-pubertal and pubertal subgroups, respectively. Regarding the mandibular base (Pancherz Analysis), the overall annualised change in pre-pubertal patients was 1.01 mm (0.21, 1.80), while in

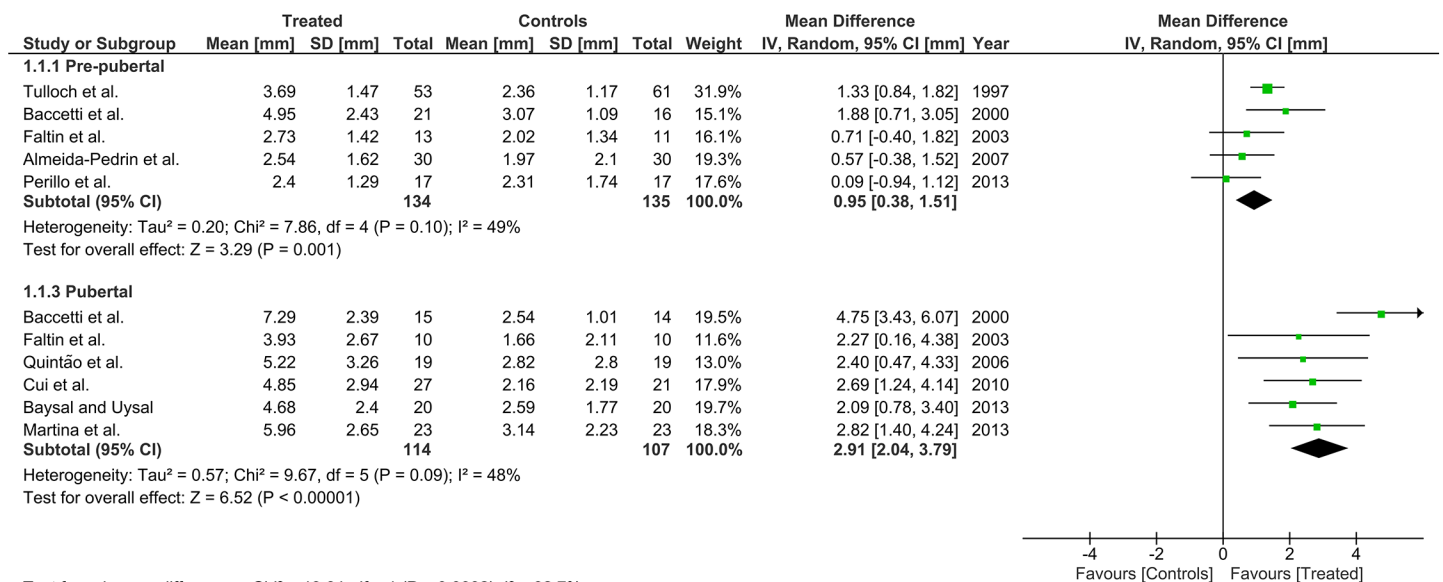

Fig 2. Forest plots for the annualised changes in total mandibular length according to the pre-pubertal and pubertal subgroups.

doi:10.1371/journal.pone.0141198.g002

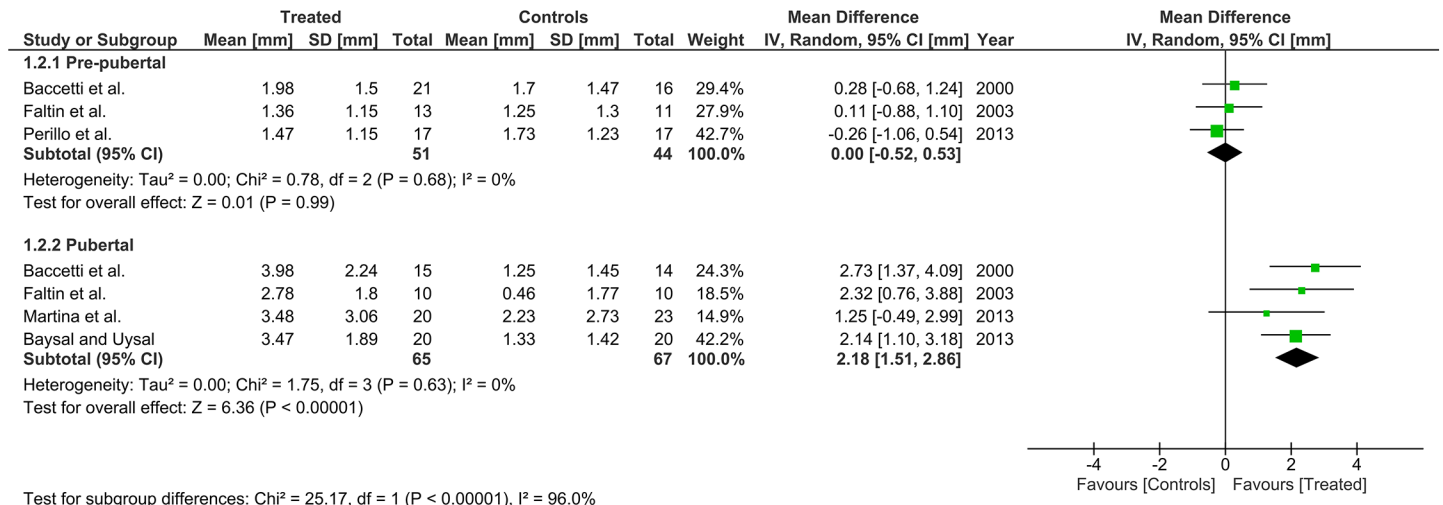

**Fig 3. Forest plots for the annualised changes in mandibular ramus height according to the pre-pubertal and pubertal subgroups.**

doi:10.1371/journal.pone.0141198.g003

pubertal patients, the overall annualised change was 1.63 mm (0.98, 2.28), without significant differences between subgroups (p = 0.24; Fig 3). The prediction intervals of the annualised changes ranged from -2.47 to 4.49 mm and from 0.26 to 3.00 mm in the pre-pubertal and pubertal subgroups, respectively.

### Meta-analysis for the secondary outcomes

The cephalometric measurements used in each study, and pooled herein for the meta-analysis are reported in Table 11. Detailed results for the meta-analysis are shown in Figs 6–11 for the secondary outcomes with 90% prediction intervals summarised in Table 12. Overall effects are expressed as mean (95% confidence interval). For the SNA angle, the overall annualised change in pre-pubertal patients was -0.02° (-0.29, 0.25). While in pubertal patients, the overall

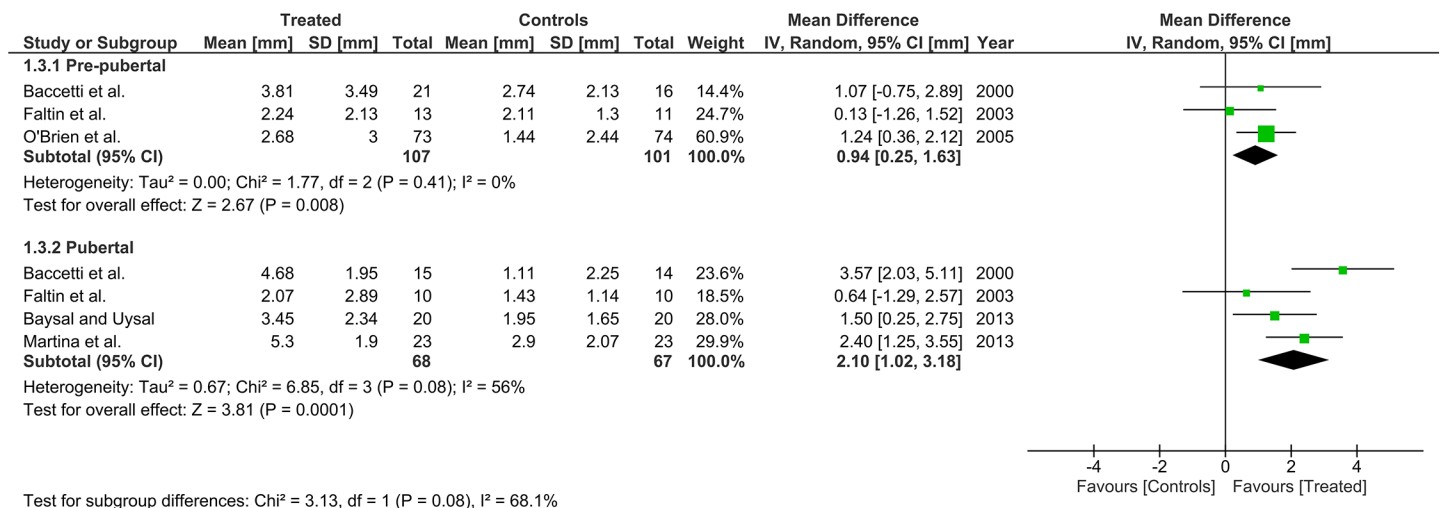

**Fig 4. Forest plots for the annualised changes in composite mandibular length (Panherz analysis) according to the pre-pubertal and pubertal subgroups.**

doi:10.1371/journal.pone.0141198.g004

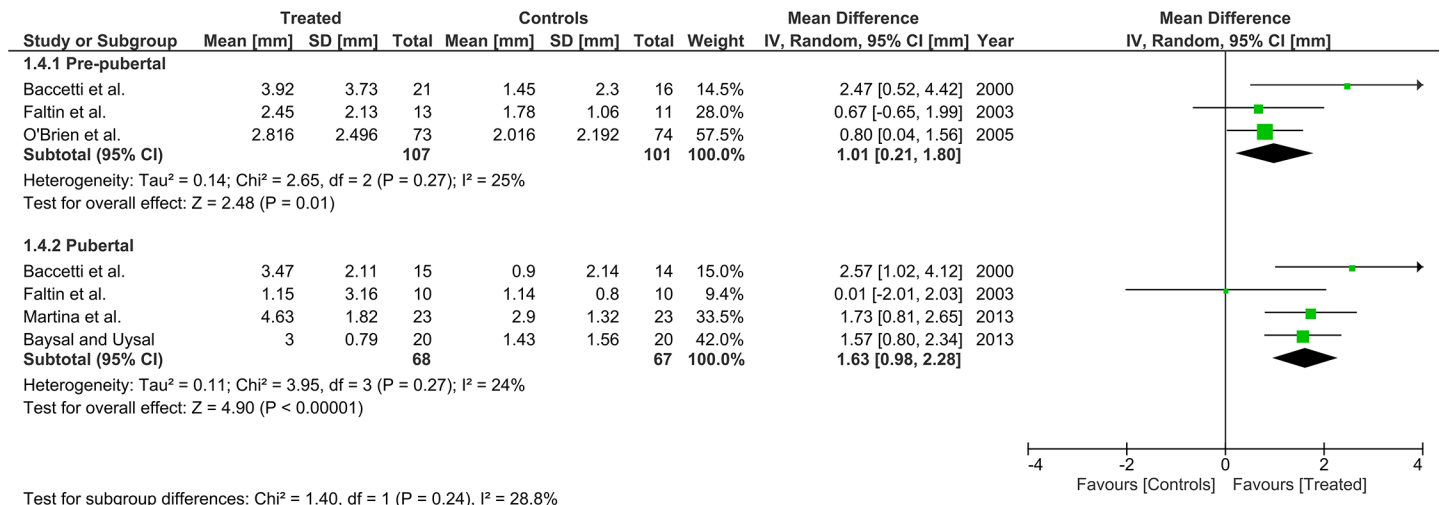

**Fig 5. Forest plots for the annualised changes in mandibular base (Pancherz analysis) according to the pre-pubertal and pubertal subgroups.**

doi:10.1371/journal.pone.0141198.g005

annualised change was  $-0.05^\circ$  ( $-1.02, 0.08$ ), but the difference between the two subgroups was not significant at  $p = 0.15$ , and the  $I^2$  values were 0% and 56% for the pre-pubertal and pubertal subgroups, respectively (Fig 6). The prediction intervals of the annualised changes ranged from  $-0.89^\circ$  to  $0.85^\circ$  and from  $-3.35^\circ$  to  $2.41^\circ$  in the pre-pubertal and pubertal subgroups, respectively. Regarding the SNB angle, the overall annualised change in pre-pubertal patients was  $0.56^\circ$  ( $0.11, 1.01$ ) and of  $1.00^\circ$  ( $0.60, 1.39$ ) in pubertal patients, with no significant ( $p = 0.15$ ) differences between the subgroups, and the  $I^2$  values were 72% and 0% for the pre-pubertal and pubertal subgroups, respectively (Fig 7). The prediction intervals of the annualised changes ranged from  $-2.06^\circ$  to  $3.18^\circ$  and from  $-0.27^\circ$  to  $2.27^\circ$  in the pre-pubertal and pubertal subgroups, respectively. For the ANB angle, the overall annualised change in pre-pubertal patients was  $-0.73^\circ$  ( $-0.95, -0.50$ ) while, in pubertal patients, the overall annualised change was  $-2.14^\circ$  ( $-3.09, -1.18$ ). The difference between the subgroups was significant at  $p < 0.01$ , and the  $I^2$  values were 0% and 88% for the pre-pubertal and pubertal subgroups, respectively (Fig 8). The

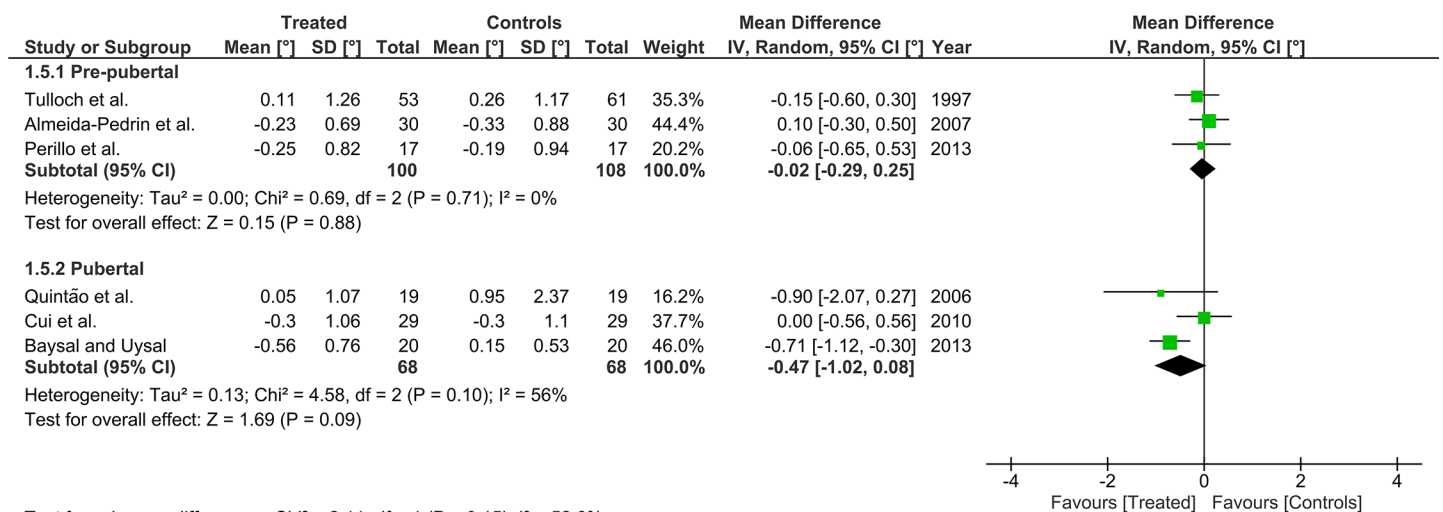

**Fig 6. Forest plots for the annualised changes in SNA angle according to the pre-pubertal and pubertal subgroups.**

doi:10.1371/journal.pone.0141198.g006

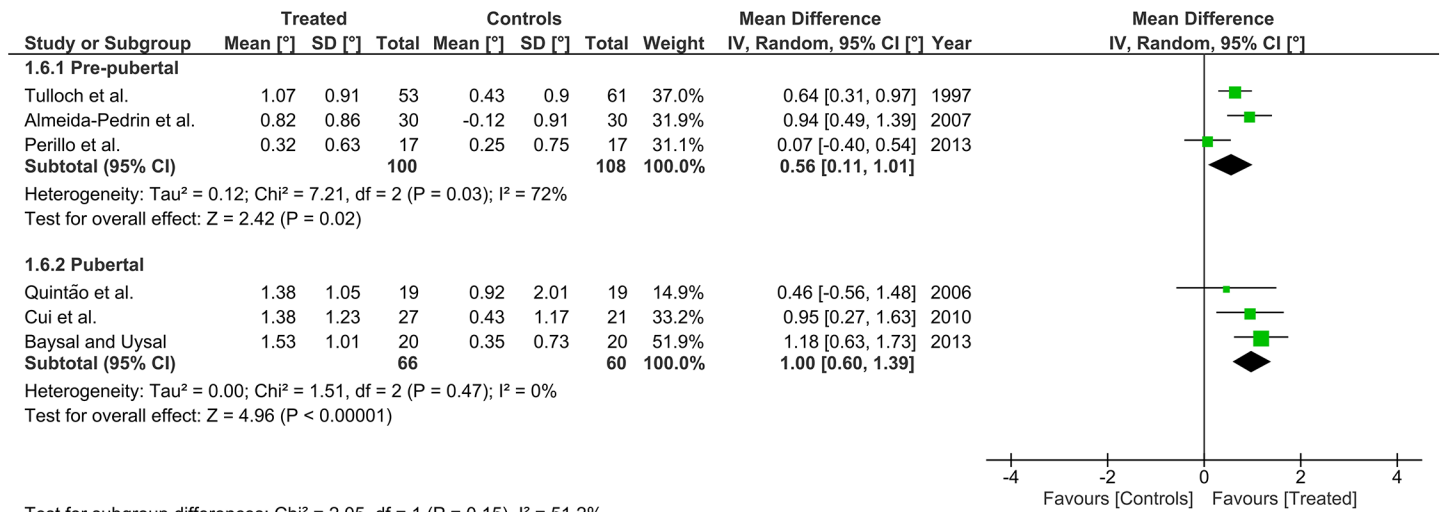

Test for subgroup differences: Chi<sup>2</sup> = 2.05, df = 1 (P = 0.15), I<sup>2</sup> = 51.2%

**Fig 7. Forest plots for the annualised changes in SNB angle according to the pre-pubertal and pubertal subgroups.**

doi:10.1371/journal.pone.0141198.g007

prediction intervals of the annualised changes ranged from -1.45° to -0.01° and from -8.02° to 3.74° in the pre-pubertal and pubertal subgroups, respectively. Regarding the Maxillary base (Pancherz Analysis), the overall annualised change in pre-pubertal patients was -0.62 mm (-0.97, -0.27) and -0.49 mm (-0.84, -0.15) in pubertal patients. The difference between the subgroups was not significant at p = 0.66, and the I<sup>2</sup> values were 0% for both the subgroups (Fig 9). The prediction intervals of the annualised changes ranged from -1.75 to 0.51 mm and from -1.00 to 0.02 mm in the pre-pubertal and pubertal subgroups, respectively. For the facial divergence, the overall annualised change in pre-pubertal patients was 0.27° (-0.25, 0.79), while in pubertal patients, the overall annualised change was 0.80° (0.34, 1.26). The difference between the subgroups was not significant at p = 0.14, and the I<sup>2</sup> values were 55% and 0% for the pre-pubertal and pubertal subgroups, respectively (Fig 10). The prediction intervals of the annualised changes ranged from -1.10° to 1.64° and from -0.25° to 1.35° in the pre-pubertal and

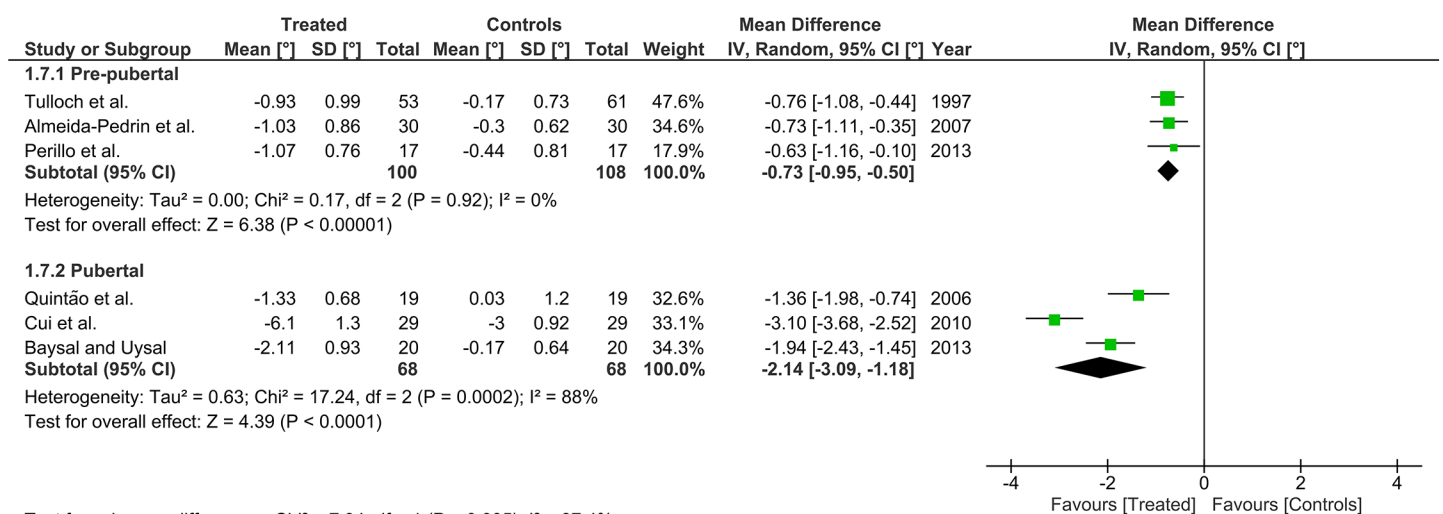

Test for subgroup differences: Chi<sup>2</sup> = 7.94, df = 1 (P = 0.005), I<sup>2</sup> = 87.4%

**Fig 8. Forest plots for the annualised changes in ANB angle according to the pre-pubertal and pubertal subgroups.**

doi:10.1371/journal.pone.0141198.g008

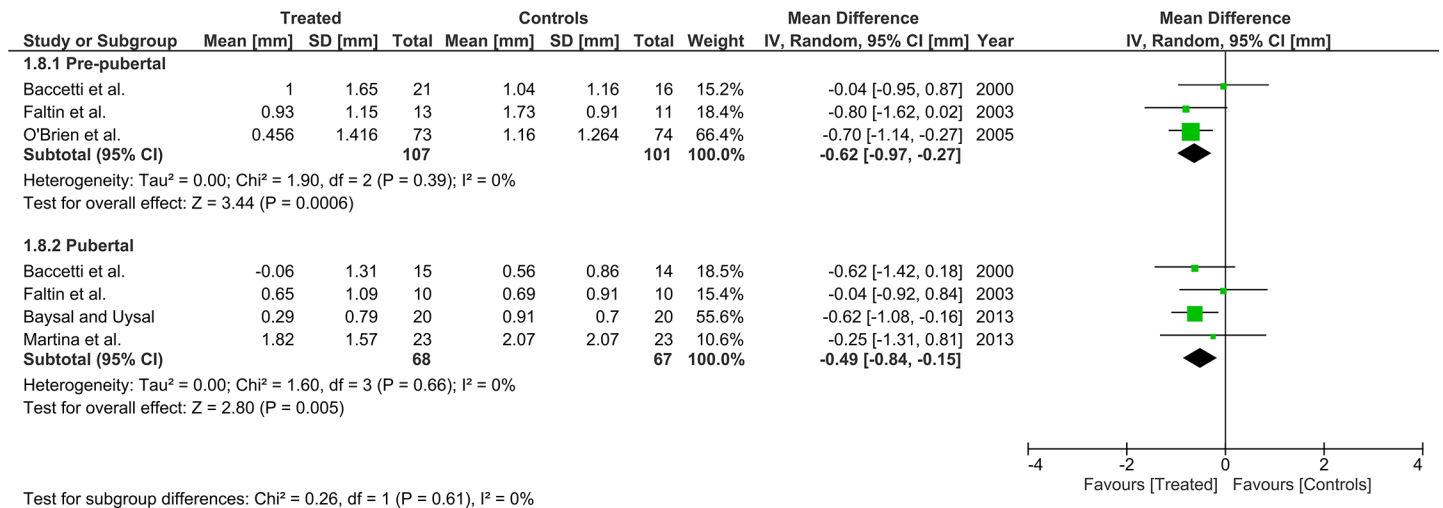

**Fig 9. Forest plots for the annualised changes in maxillary base (Pancherz analysis) according to the pre-pubertal and pubertal subgroups.**

doi:10.1371/journal.pone.0141198.g009

pubertal subgroups, respectively. Finally, for the mandibular incisor proclination, the overall annualised change in pre-pubertal patients was 1.37° (0.38, 2.36) and 0.79° (-0.66, 2.25) in pubertal patients. The difference between the subgroups was not significant at p = 0.52, and the I<sup>2</sup> values were 0% and 47% for the pre-pubertal and pubertal subgroups, respectively (Fig 11). The prediction intervals of the annualised changes was not derivable for the pre-pubertal patients, while for the pubertal patients ranged from -6.49° to 8.07°.

### GRADE Assessment

The GRADE assessment for each of the primary outcome with detailed information is shown in Table 13. For the pre-pubertal patients, the quality of evidence was low for all the outcomes.

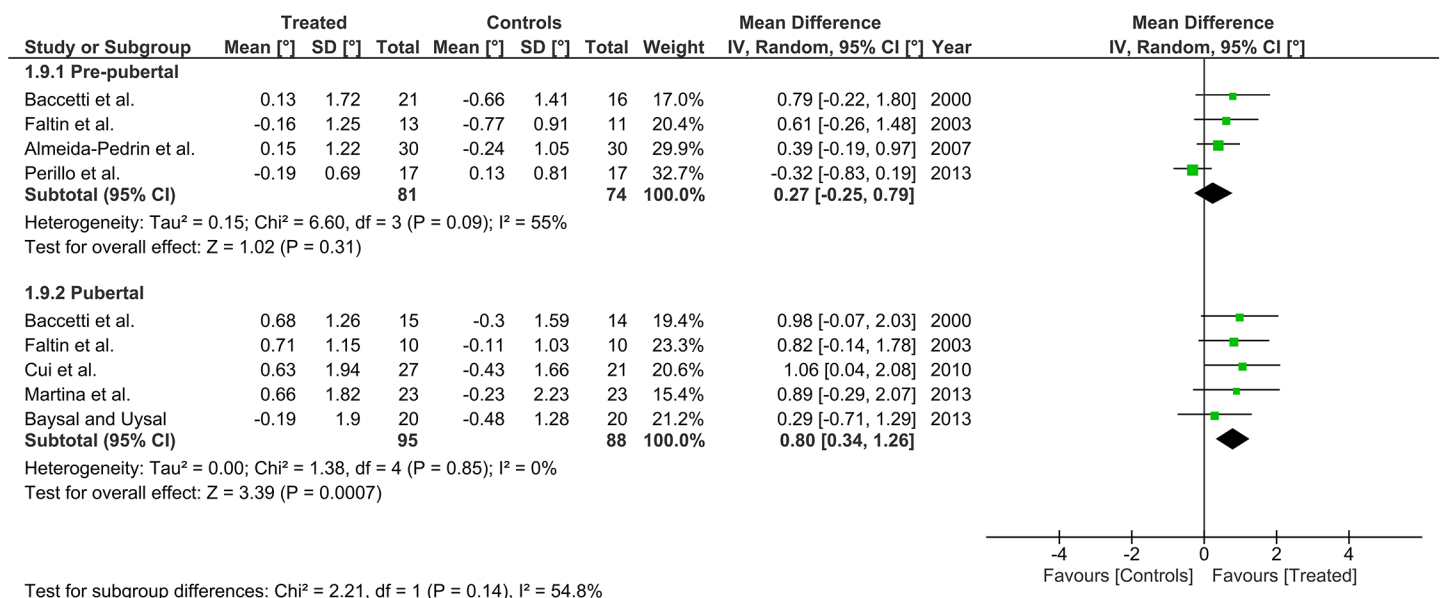

**Fig 10. Forest plots for the annualised changes in facial divergence according to the pre-pubertal and pubertal subgroups.**

doi:10.1371/journal.pone.0141198.g010



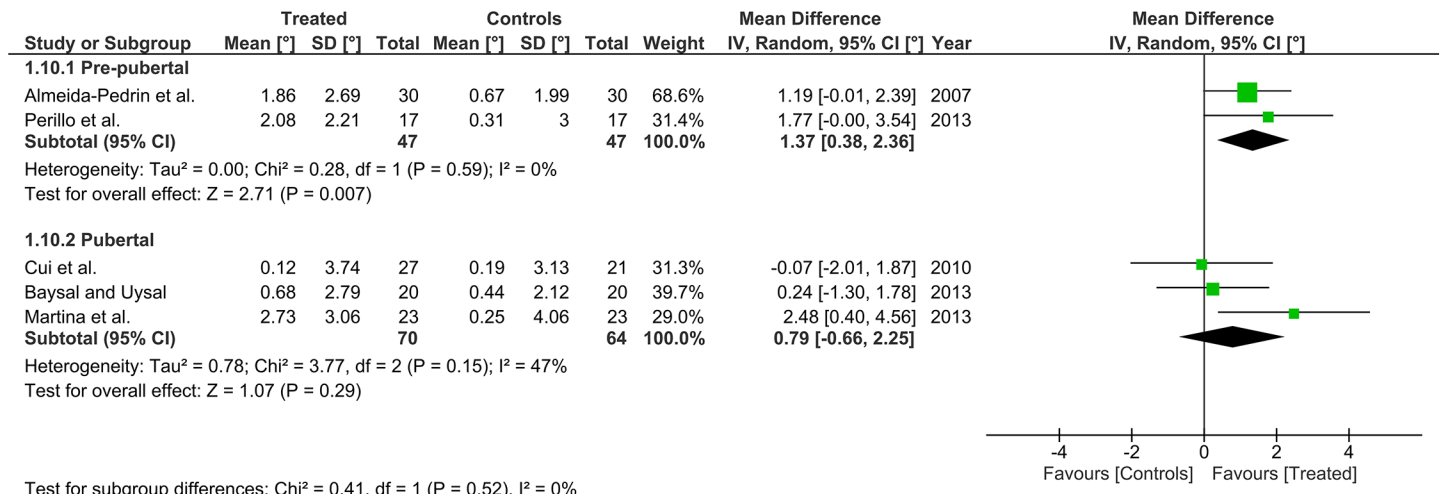

**Fig 11. Forest plots for the annualised changes in mandibular incisor proclination according to the pre-pubertal and pubertal subgroups.**

doi:10.1371/journal.pone.0141198.g011

For the pubertal patients, the overall quality was between low (composite mandibular length) to moderate (for all the other outcomes). Reasons for downgrading were related to the items ‘risk of bias’ (use of CCT, historical controls, and other bias as stated above) and ‘imprecision’

**Table 10. The p values of the Egger regression intercept test and Begg and Mazumdar rank correlation test on the on the publication bias analyses for each of the included parameter according to the pre-pubertal and pubertal subgroups.**

| Variable                        | Subgroup     | Test            |                   |
|---------------------------------|--------------|-----------------|-------------------|
|                                 |              | Egger           | Begg and Mazumdar |
| Total mandibular length         | Pre-pubertal | 0.467           | 1.000             |
|                                 | Pubertal     | 0.551           | 0.452             |
| Mandibular ramus height         | Pre-pubertal | 0.213           | 1.000             |
|                                 | Pubertal     | 0.717           | 0.734             |
| Composite mandibular length     | Pre-pubertal | 0.646           | 1.000             |
|                                 | Pubertal     | 0.752           | 0.734             |
| Mandibular base                 | Pre-pubertal | 0.472           | 0.296             |
|                                 | Pubertal     | 0.750           | 1.000             |
| SNA                             | Pre-pubertal | 0.706           | 1.000             |
|                                 | Pubertal     | 0.798           | 1.000             |
| SNB                             | Pre-pubertal | 0.816           | 1.000             |
|                                 | Pubertal     | 0.020, <b>a</b> | 0.296             |
| ANB                             | Pre-pubertal | 0.055, <b>a</b> | 0.296             |
|                                 | Pubertal     | 0.056, <b>a</b> | 0.296             |
| Maxillary base                  | Pre-pubertal | 0.296           | 0.603             |
|                                 | Pubertal     | 0.278           | 0.308             |
| Facial divergence               | Pre-pubertal | 0.193           | 0.089, <b>a</b>   |
|                                 | Pubertal     | 0.643           | 0.806             |
| Mandibular incisor proclination | Pre-pubertal | —               | —                 |
|                                 | Pubertal     | 0.628           | 1.000             |

Publication bias analysis does not include the study by Singh *et al.* [40] excluded according to the risk of bias and sensitivity analyses. Further notes: **a**, significant p value denoting publication bias; —, p value not derivable since only 2 studies were included.

doi:10.1371/journal.pone.0141198.t010

**Table 11. The cephalometric measurements that were pooled for the meta-analyses.**

| Study                       | Total mandibular length (mm) | Mandibular ramus height (mm) | Composite mandibular length (Pancherz analysis, mm) | Mandibular base (Pancherz analysis, mm) | Maxillary base (Pancherz analysis, mm) | Facial divergence (°) | Mandibular incisors proclination (°) |
|-----------------------------|------------------------------|------------------------------|-----------------------------------------------------|-----------------------------------------|----------------------------------------|-----------------------|--------------------------------------|
| Tulloch et al. [33]         | Md unit length, <b>a</b>     | NA                           | NA                                                  | NA                                      | NA                                     | NA                    | NA                                   |
| Baccetti et al. [34]        | Co-Pg                        | Co-Go                        | Pg/OLp + Co/OLp                                     | Pg/OLp                                  | A point/OLp                            | ml/FMN-T line         | NA                                   |
| Faltin et al. [35]          | Co-Pg                        | Co-Go                        | Pg/OLp + Co/OLp                                     | Pg/OLp                                  | A point/OLp                            | ml/FMN-T line         | NA                                   |
| O'Brien et al. [36]         | NA                           | NA                           | Pg/OLp + Co/OLp                                     | Pg/OLp                                  | A point/OLp                            | NA                    | NA                                   |
| Quintão et al. [37]         | Co-Gn                        | NA                           | NA                                                  | NA                                      | NA                                     | NA                    | NA                                   |
| Almeida-Pedrin et al. [38]  | Co-Gn                        | NA                           | NA                                                  | NA                                      | NA                                     | SN.GoGn               | IMPA                                 |
| Cui et al. [39]             | Co-Gn                        | NA                           | NA                                                  | NA                                      | NA                                     | NA                    | L1-MP                                |
| Singh et al. [40]           | Cd-Gn                        | Cd-Go                        | NA                                                  | NA                                      | NA                                     | FMA                   | LI-MnP                               |
| Baysal and Uysal [41], [44] | Co-Gn                        | Co-Go                        | Pg/OLp + Co/OLp                                     | Pg/OLp                                  | A point/OLp                            | SN-GoGn               | IMPA                                 |
| Martina et al. [42]         | Co-Pg                        | Co-Go                        | Pg/OLp + Co/OLp                                     | Pg/OLp                                  | Ss point/OLp                           | SN-MP                 | IMPA                                 |
| Perillo et al. [43]         | Co-Gn                        | Co-Go, <b>b</b>              | NA                                                  | NA                                      | NA                                     | FH-MP                 | L1/MP                                |

**Co** or **Cd**, Condylion; **Go**, Gonion; **Gn**, Gnathion; **Pg**, Pogonion; **Md**, mandibular; **MP** or **MnP**, mandibular plane; **ml**, mandibular line; **FMN**, fronto-maxillo-nasal suture; **FH**, Frankfurt horizontal; **L1** or **LI** or **1-**, mandibular incisor axis; **IMPA**, lower incisor mandibular plane angle; **NA**, not available. Pancherz analysis according to a previous report [27]. Further notes:

**a**, reference points not provided

**b**, data provided by the Authors.

doi:10.1371/journal.pone.0141198.t011

(according to the heterogeneity seen) and for inclusion of small studies. No downgrading was assessed for the inconsistency, indirectness or publication bias (according to the results of the analyses reported above). Finally, upgrading mainly responsible for the greater quality seen in the pubertal subgroup as compared to the pre-pubertal one was due to the dimension of the treatment effect for total mandibular length, mandibular ramus height and mandibular base that reached a 'large effect'.

## Discussion

The present review allowed the comparison of the effects of functional treatment of skeletal Class II malocclusion by removable appliances between pre-pubertal and pubertal patients. Study designs and main results at the skeletal, dentoalveolar and soft tissue levels were reviewed. Moreover, cephalometric parameters, mainly regarding mandibular growth, were meta-analysed. Overall, taking into account relevant individual variations, the present results demonstrate clinically relevant skeletal effects in terms of additional mandibular growth only if treatment is performed during the pubertal growth phase.

**Table 12. The 95% Prediction intervals for each of the included parameter according to the pre-pubertal and pubertal subgroups.**

| Variable                             | Subgroup (n of studies) | Point estimate [90% PI] |
|--------------------------------------|-------------------------|-------------------------|
| <b>Primary outcome</b>               |                         |                         |
| Total mandibular length (mm)         | Pre-pubertal (5)        | 0.95 [-0.30, 2.20]      |
|                                      | Pubertal (6)            | 2.91 [1.04, 4.78]       |
| Mandibular ramus height (mm)         | Pre-pubertal (3)        | 0.00 [-1.69, 1.69]      |
|                                      | Pubertal (4)            | 2.18 [1.17, 3.19]       |
| Composite mandibular length (mm)     | Pre-pubertal (3)        | 0.94 [-1.28, 3.16]      |
|                                      | Pubertal (4)            | 2.10 [-0.78, 4.98]      |
| Mandibular base (mm)                 | Pre-pubertal (3)        | 1.01 [-2.47, 4.49]      |
|                                      | Pubertal (4)            | 1.63 [0.26, 3.00]       |
| <b>Secondary outcome</b>             |                         |                         |
| SNA angle (°)                        | Pre-pubertal (3)        | -0.02 [-0.89, 0.85]     |
|                                      | Pubertal (3)            | -0.47 [-3.35, 2.41]     |
| SNB angle (°)                        | Pre-pubertal (3)        | 0.56 [-2.06, 3.18]      |
|                                      | Pubertal (3)            | 1.00 [-0.27, 2.27]      |
| ANB angle (°)                        | Pre-pubertal (3)        | -0.73 [-1.45, -0.01]    |
|                                      | Pubertal (3)            | -2.14 [-8.02, 3.74]     |
| Maxillary base (mm)                  | Pre-pubertal (3)        | -0.69 [-1.75, 0.51]     |
|                                      | Pubertal (4)            | -0.49 [-1.00, 0.02]     |
| Facial divergence (°)                | Pre-pubertal (4)        | 0.27 [-1.10, 1.64]      |
|                                      | Pubertal (5)            | 0.80 [0.25, 1.35]       |
| Mandibular incisors proclination (°) | Pre-pubertal (2)        | 1.37 [—, —]             |
|                                      | Pubertal (3)            | 0.79 [-6.49, 8.07]      |

PI, prediction intervals, —, prediction interval not derivable since only 2 studies were included. Refer to Figs 2–11 for studies included in each subgroup analysis.

doi:10.1371/journal.pone.0141198.t012

In spite of the large number of studies initially retrieved (Fig 1), most of them analysed in full-text were excluded because they did not consider a reliable indicator of skeletal maturity, or because they lacked of an untreated Class II control group (Table 3). Interestingly, a relevant RCT on pubertal subjects [42] was missed in one of the most recent meta-analyses [6].

Even though different treatment modalities were followed in the included studies (and after removal of a low quality investigation [40], heterogeneity among the studies was acceptable with  $I^2$  mostly below 50% for the primary outcomes and some secondary outcomes (Figs 2–5) with consistent results. On the contrary, SNA, SNB and ANB angles showed substantial heterogeneity. Of note, heterogeneity seen herein at the subgroup level for the main outcomes was generally below those reported in other similar investigations [12] where the growth phase was not considered as a clustering factor. Therefore, the different growth phase may explain part of the heterogeneity (and apparent inconsistency of the results) previously reported.

Herein, clinically relevant effects in terms of additional mandibular elongation was seen for the pubertal patients of 2.91 mm/year (Fig 2). Similar clinically relevant results were seen herein for the additional increment of the mandibular ramus height (Fig 3). However, different removable appliances may have different *modus operandi* requiring differential treatment duration. A previous meta-analysis [4] reported no significant effects of functional treatment in Class II patients. This meta-analysis used standardised mean differences (obtained merging several parameters) for the estimation of the overall effects. However, while standardised mean differences may give an indication of the variability among individuals, they do not describe

**Table 13. The GRADE assessment for each of the primary outcomes, according to the pre-pubertal and pubertal subgroups.**

| Outcomes                                        | No of Participants/<br>studies/<br>Follow up | Quality of the evidence (GRADE)                                        | Anticipated absolute effects                                                                                      |                                                                                                                                  |
|-------------------------------------------------|----------------------------------------------|------------------------------------------------------------------------|-------------------------------------------------------------------------------------------------------------------|----------------------------------------------------------------------------------------------------------------------------------|
|                                                 |                                              |                                                                        | Risk with Control                                                                                                 | Risk difference with functional treatment (95% CI)                                                                               |
| <b>Pre-pubertal subjects</b>                    |                                              |                                                                        |                                                                                                                   |                                                                                                                                  |
| Total mandibular length                         | 269/ 5 studies/ 1.0–1.8 years                | <b>LOW a,b</b> - due to risk of bias, imprecision                      | The mean total mandibular length ranged across control groups from <b>2.02 to 3.07 mm</b>                         | The mean total mandibular length in the intervention groups was <b>0.95 higher</b> (0.38 to 1.51 higher)                         |
| Mandibular ramus height                         | 135/ 3 studies/ 1.0–1.8 years                | <b>LOW c,d</b> —due to risk of bias, imprecision                       | The mean mandibular ramus height ranged across control groups from <b>1.25 to 1.73 mm</b>                         | The mean mandibular ramus height in the intervention groups was <b>0.00 higher</b> (0.52 lower to 0.53 higher)                   |
| Composite mandibular length (Pancherz analysis) | 208/ 3 studies/ 1.0–1.8 years                | <b>LOW a,d</b> —due to risk of bias, imprecision                       | The mean composite mandibular length (Pancherz analysis) ranged across control groups from <b>1.44 to 2.74 mm</b> | The mean composite mandibular length (Pancherz analysis) in the intervention groups was <b>0.94 higher</b> (0.25 to 1.63 higher) |
| Mandibular base (Pancherz analysis)             | 208/ 3 studies/ 1.0–1.8 years                | <b>LOW a,b</b> - due to risk of bias, imprecision                      | The mean mandibular base (Pancherz analysis) ranged across control groups from <b>1.45 to 2.02 mm</b>             | The mean mandibular base (Pancherz analysis) in the intervention groups was <b>1.01 higher</b> (0.21 to 1.8 higher)              |
| <b>Pubertal subjects</b>                        |                                              |                                                                        |                                                                                                                   |                                                                                                                                  |
| Total mandibular length                         | 221/ 6 studies/ 1.0–2.3 years                | <b>MODERATE b,c,e</b> - due to risk of bias, imprecision, large effect | The mean total mandibular length ranged across control groups from <b>1.66 to 3.14 mm</b>                         | The mean total mandibular length in the intervention groups was <b>2.91 higher</b> (2.04 to 3.79 higher)                         |
| Mandibular ramus height                         | 132/ 4 studies/ 1.0–2.3 years                | <b>MODERATE a,d,f</b> - due to risk of bias, imprecision, large effect | The mean mandibular ramus height ranged across control groups from <b>0.46 to 2.23 mm</b>                         | The mean mandibular ramus height in the intervention groups was <b>2.18 higher</b> (1.51 to 2.86 higher)                         |
| Composite mandibular length (Pancherz analysis) | 135/ 4 studies/ 1.0–2.3 years                | <b>LOW a,b</b> - due to risk of bias, imprecision                      | The mean composite mandibular length (Pancherz analysis) ranged across control groups from <b>1.11 to 1.95 mm</b> | The mean composite mandibular length (Pancherz analysis) in the intervention groups was <b>2.10 higher</b> (1.02 to 3.18 higher) |
| Mandibular base (Pancherz analysis)             | 135/ 4 studies/ 1.0–2.3 years                | <b>MODERATE a,b,g</b> —due to risk of bias, imprecision, large effect  | The mean mandibular base (Pancherz analysis) ranged across control groups from <b>0.90 to 1.43 mm</b>             | The mean mandibular base (Pancherz analysis) in the intervention groups was <b>1.63 higher</b> (0.98 to 2.28 higher)             |

CI, confidence interval. Notes on the GRADE assessment:

- a, only 1 randomised study, historical controls, other less relevant biases
- b, different treatment durations/observation, modest heterogeneity, 1 small study
- c, no randomised study, historical controls, other less relevant biases
- c, different treatment durations/observation, 1 small study
- e, additional mandibular elongation above 2.5 mm/year
- f, additional mandibular elongation above 2.0 mm/year

doi:10.1371/journal.pone.0141198.t013

the magnitude of the effect. Further meta-analyses reported some skeletal effects for functional treatment of Class II malocclusion by the use of the Functional Regulator-2 [12] and Twin-Block [7], even though the Authors were not conclusive in terms of treatment efficiency. On the contrary, the results of the present study on pubertal patients may be compared with those from a recent meta-analysis [13] on fixed functional appliance where the mean additional mandibular (total length) growth as compared to matched untreated subjects was about 2 mm. Even though this previous meta-analysis did not report annualised changes it might be hypothesised that, irrespective of the fixed or removable appliance used, skeletal effects are dependent on the growth phase (pubertal) during which treatment is performed.

Of note, a noteworthy individual variation in terms of treatment responsiveness was also seen in pubertal patients particularly for the annualised total mandibular length increment (prediction

interval from 1.04 to 4.78 mm, [Table 12](#)). In this regard, individual variations has been previously reported in pubertal Class II patients treated by functional appliances with the condylar angle as one of the prognostic feature [\[10\]](#). Interestingly, none of the included studies herein has classified patients according to this prognostic feature ([Table 5](#)). However, the present meta-analysis may not discriminate whether such individual variation in treatment effects was due to the different treatment protocols, patient's compliance or biological individual responsiveness. In spite of these aspects, the present results would be consistent with previous findings reporting insulin growth factor 1 among the key factors promoting chondrogenesis of the condylar cartilage [\[45\]](#), the serum levels of which would be to be significantly greater in the pubertal as compared to pre-pubertal subjects, as determined though the CVM method [\[46\]](#), [\[47\]](#).

While a relevant 'headgear' effect has been reported for the fixed functional appliances used during the pubertal growth phase [\[13\]](#), herein, irrespective of the growth phase of the patients, a limited maxillary growth restrain ([Figs 6 and 9, Table 12](#)) was seen. Taking also into account previous findings [\[7\]](#), it may be hypothesised that removable and fixed functional appliances have different effects on maxillary bone.

An increase in facial divergence was not seen herein ([Fig 10, Table 12](#)) while, a slightly greater (although not significant) mandibular incisors proclination was seen for pre-pubertal patients ([Fig 11, Table 12](#)). However, this proclination appears to be of limited clinical relevance in either pre-pubertal or pubertal patients. On the contrary, increase in both these parameters have been reported earlier for the Twin-Block treatment [\[7\]](#). The individual management of the dentition, i.e. extrusion of mandibular teeth, during treatment may explain at least part of this apparent inconsistency.

## Limitations of the review

The current investigation on the effects of functional treatment of Class II malocclusion is inherently hampered by some factors. In spite of the use of annualised changes, observational terms may include not only the effective functional treatment, but also variable periods of time of retention, or of further management of the dentition. Therefore, skeletal changes might occur not uniformly during the entire observational term skewing the analysis of treatment outcomes [\[5\]](#). The studies included were mostly CCTs, and in 5 studies treated groups followed a retrospective enrolment of the treated group [\[34\]](#), [\[35\]](#), [\[39\]](#), [\[40\]](#), [\[43\]](#) ([Table 5](#)). Hardly to be avoided, heterogeneity of the selected studies was mainly seen in the treatment duration, type of appliance used (even though they all share the mechanism of forward posturing of the mandible), or severity of malocclusion ([Table 5](#)). Moreover, 2 studies [\[33\]](#), [\[36\]](#) used overjet as the only diagnostic criterion for Class II malocclusion, even though in 1 study [\[33\]](#), likely most of the patients had a skeletal Class II malocclusion according to mean  $\pm$ SD of ANB angle of  $\sim 6.3^\circ \pm 2.0^\circ$ . One study [\[40\]](#) was judged to be affected by a significant risk of bias ([Table 8](#)) and had to be excluded from the meta-analysis. Some of the included studies had small sample sizes [\[35\]](#), [\[40\]](#), and in 2 studies [\[37\]](#), [\[39\]](#) cephalometric magnification was not declared or retrieved (even though linear measurement used herein were not reported in those investigations, the rest of the data were set at 0% magnification). Moreover, similar skeletal outcomes were defined slight differently at the cephalometric recording (see above and [Table 11](#)). Finally, an analysis of the potential responsiveness to treatment according to gender or other prognostic factors was not feasible, and this review has focused on short-term effects.

The GRADE quality of evidence assessment was moderate for several main outcomes ([Table 13](#)) mainly due to the large effect assigned to these outcomes according to the re-establishment of normal growth in Class II patients [\[32\]](#). However, studies with an improved level of quality are necessary, with regard to prospective enrolment, full description of Class II features,

adequate statistical analysis, and other related information. Even RCTs should rely on skeletal assessment of Class II malocclusion instead of using the overjet, which is more indicative of prominent upper frontal teeth and not always associated with a genuine Class II skeletal pattern [21].

## Clinical implications

Within the limitations and heterogeneity of the included studies it appears that, in spite of the specific type of appliance used and the protocol followed, functional treatment with removable appliances would be valid in correcting skeletal Class II malocclusion. However, the effects behind the correction would be related to treatment timing. Skeletal corrections, including mainly mandibular elongation with minimal or no maxillary growth restraint, may be achieved if treatment is performed during the pubertal rather than pre-pubertal growth phase. All the radiographical methods used in the included studies both based on the HWM [33], [37], [39], [41], [43], [44] and CVM method [34–36], [38], [40], [42] methods that have been shown to be related to the mandibular growth spurt and stature height [48], [49], [50]. Moreover, the CVM method has showed to be repeatable to a satisfactory level when executed by trained operators [51]. Finally, a simplified third finger maturation (derived from full HWM) and CVM methods have showed a good degree of correlation and diagnostic agreement, suggesting a combined use according to the available radiographical record [52]. This would be particularly useful when skeletal maturations has to be followed longitudinally in pre-pubertal patients until the beginning of the pubertal growth phase. However, a pure skeletal effect would not be expected even during puberty, as some dentoalveolar effects are also present, even though, mandibular incisor proclination consequent to functional treatment would be limited with minimal clinical implications, especially for pubertal patients. Similarly, an increase of facial divergence was very minimal or absent in both pre-pubertal and pubertal patients. Even though further evidence is needed, the use of a reliable indicator of skeletal maturity either HWM or CVM may be recommended in routine clinical practice to make efforts to perform treatment during the pubertal growth phase.

## Conclusions

Taking into account the still limited quality of the reported studies, and their heterogeneity in terms of study designs, treatment protocols and appliances used, the following conclusion may be drawn:

- Functional treatment by removable appliances may be effective in correcting Class II malocclusion with relevant skeletal effects if performed during the pubertal growth phase. Skeletal effects of functional treatment were seen at the mandibular level and consist mainly in mandibular elongation and increase in ramus height, although dentoalveolar effects were detected even in pubertal patients.
- However, both the increases in total mandibular length and in ramus height showed a noteworthy individual variation to treatment responsiveness in pubertal patients.
- Irrespective of the growth phase, no or very minimal effects were seen in terms of maxillary growth restraint or increase in facial divergence
- Further high quality RCTs with proper inclusion criteria for skeletal Class II malocclusion are needed to fully elucidate the role of growth phase in the efficiency of functional treatment with removable appliances



## Supporting Information

**S1 PRISMA Checklist.**

(DOC)

**S1 Table. Main data set underlying the meta-analysis as RevMan file format.**

(RM5)

## Author Contributions

Conceived and designed the experiments: GP LF. Performed the experiments: GP JP LC. Analyzed the data: GP. Wrote the paper: LF JP LC.

## References

1. McNamara JA Jr, Hinton RJ, Hoffman DL (1982) Histologic analysis of temporomandibular joint adaptation to protrusive function in young adult rhesus monkeys (*Macaca mulatta*). *Am J Orthod* 82: 288–298. PMID: [6961801](#)
2. Proff P, Gedrange T, Franke R, Schubert H, Fanghanel J, Mieke B, et al. (2007) Histological and histomorphometric investigation of the condylar cartilage of juvenile pigs after anterior mandibular displacement. *Ann Anat* 189: 269–275. PMID: [17534034](#)
3. McNamara JA Jr, Brudon WL (2001) Orthodontics and dentofacial orthopedics. Ann Arbor: Needham Press.
4. Marsico E, Gatto E, Burrascano M, Matarese G, Cordasco G (2011) Effectiveness of orthodontic treatment with functional appliances on mandibular growth in the short term. *Am J Orthod Dentofacial Orthop* 139: 24–36. doi: [10.1016/j.ajodo.2010.04.028](#) PMID: [21195273](#)
5. Chen JY, Will LA, Niederman R (2002) Analysis of efficacy of functional appliances on mandibular growth. *Am J Orthod Dentofacial Orthop* 122: 470–476. PMID: [12439474](#)
6. Thiruvengkatachari B, Harrison JE, Worthington HV, O'Brien KD (2013) Orthodontic treatment for prominent upper front teeth (Class II malocclusion) in children. *Cochrane Database Syst Rev* 11: CD003452. doi: [10.1002/14651858.CD003452.pub3](#) PMID: [24226169](#)
7. Ehsani S, Nebbe B, Normando D, Lagravere MO, Flores-Mir C (2014) Short-term treatment effects produced by the Twin-block appliance: a systematic review and meta-analysis. *Eur J Orthod Epub* doi: [10.1093/ejo/cju030](#)
8. Cozza P, Baccetti T, Franchi L, De Toffol L, McNamara JA Jr. (2006) Mandibular changes produced by functional appliances in Class II malocclusion: a systematic review. *Am J Orthod Dentofacial Orthop* 129: 599 e591-512.
9. Antonarakis GS, Kiliaridis S (2007) Short-term anteroposterior treatment effects of functional appliances and extraoral traction on class II malocclusion. A meta-analysis. *Angle Orthod* 77: 907–914. PMID: [17902235](#)
10. Franchi L, Baccetti T (2006) Prediction of individual mandibular changes induced by functional jaw orthopedics followed by fixed appliances in Class II patients. *Angle Orthod* 76: 950–954. PMID: [17090170](#)
11. Baccetti T, Franchi L, McNamara JAJ (2005) The cervical vertebral maturation (CVM) method for the assessment of optimal treatment timing in dentofacial orthopedics. *Semin Orthod* 11: 119–129.
12. Perillo L, Cannavale R, Ferro F, Franchi L, Masucci C, Chiodini P, et al. (2011) Meta-analysis of skeletal mandibular changes during Frankel appliance treatment. *Eur J Orthod* 33: 84–92. doi: [10.1093/ejo/cjq033](#) PMID: [20639280](#)
13. Perinetti G, Primozic J, Furlani G, Franchi F, Contardo L (2015) Treatment effects of fixed functional appliances alone or in combination with multibracket appliances in pubertal and post-pubertal Class II patients. A systematic review and meta-analysis. *Angle Orthod* 85: 480–492. doi: [10.2319/102813-790.1](#) PMID: [25188504](#)
14. Flores-Mir C (2007) Can we extract useful and scientifically sound information from retrospective non-randomized trials to be applied in orthodontic evidence-based practice treatments? *Am J Orthod Dentofacial Orthop* 131: 707–709. PMID: [17561046](#)
15. Shrier I, Boivin JF, Steele RJ, Platt RW, Furlan A, Kakuma R, et al. (2007) Should meta-analyses of interventions include observational studies in addition to randomized controlled trials? A critical examination of underlying principles. *Am J Epidemiol* 166: 1203–1209. PMID: [17712019](#)



16. Liberati A, Altman DG, Tetzlaff J, Mulrow C, Gotzsche PC, Ioannidis JP, et al. (2009) The PRISMA statement for reporting systematic reviews and meta-analyses of studies that evaluate health care interventions: explanation and elaboration. *J Clin Epidemiol* 62: e1–34. doi: [10.1016/j.jclinepi.2009.06.006](https://doi.org/10.1016/j.jclinepi.2009.06.006) PMID: [19631507](https://pubmed.ncbi.nlm.nih.gov/19631507/)
17. Landis JR, Koch GG (1977) The measurement of observer agreement for categorical data. *Biometrics* 33: 159–174. PMID: [843571](https://pubmed.ncbi.nlm.nih.gov/843571/)
18. Centre, for, Reviews, and, Dissemination (2009) *Systematic reviews. CRD's Guidance for Undertaking Reviews in Healthcare*. York: University of York NHS Centre for Reviews & Dissemination.
19. Higgins JP, Altman DG, Gotzsche PC, Juni P, Moher D, Oxman AD, et al. (2011) The Cochrane Collaboration's tool for assessing risk of bias in randomised trials. *BMJ* 343: d5928. doi: [10.1136/bmj.d5928](https://doi.org/10.1136/bmj.d5928) PMID: [22008217](https://pubmed.ncbi.nlm.nih.gov/22008217/)
20. Downs SH, Black N (1998) The feasibility of creating a checklist for the assessment of the methodological quality both of randomised and non-randomised studies of health care interventions. *J Epidemiol Community Health* 52: 377–384. PMID: [9764259](https://pubmed.ncbi.nlm.nih.gov/9764259/)
21. Baccetti T, Giuntini V, Vangelisti A, Darendeliler MA, Franchi L (2010) Diagnostic performance of increased overjet in Class II division 1 malocclusion and incisor trauma. *Prog Orthod* 11: 145–150. doi: [10.1016/j.pio.2010.09.003](https://doi.org/10.1016/j.pio.2010.09.003) PMID: [20974451](https://pubmed.ncbi.nlm.nih.gov/20974451/)
22. Lau J, Ioannidis JP, Schmid CH (1997) Quantitative synthesis in systematic reviews. *Ann Intern Med* 127: 820–826. PMID: [9382404](https://pubmed.ncbi.nlm.nih.gov/9382404/)
23. Higgins JP, Thompson SG (2002) Quantifying heterogeneity in a meta-analysis. *Stat Med* 21: 1539–1558. PMID: [12111919](https://pubmed.ncbi.nlm.nih.gov/12111919/)
24. Egger M, Davey Smith G, Schneider M, Minder C (1997) Bias in meta-analysis detected by a simple, graphical test. *BMJ* 315: 629–634. PMID: [9310563](https://pubmed.ncbi.nlm.nih.gov/9310563/)
25. Begg CB, Mazumdar M (1994) Operating characteristics of a rank correlation test for publication bias. *Biometrics* 50: 1088–1101. PMID: [7786990](https://pubmed.ncbi.nlm.nih.gov/7786990/)
26. Sterne JA, Gavaghan D, Egger M (2000) Publication and related bias in meta-analysis: power of statistical tests and prevalence in the literature. *J Clin Epidemiol* 53: 1119–1129. PMID: [11106885](https://pubmed.ncbi.nlm.nih.gov/11106885/)
27. Pancherz H (1984) A cephalometric analysis of skeletal and dental changes contributing to Class II correction in activator treatment. *Am J Orthod* 85: 125–134. PMID: [6594053](https://pubmed.ncbi.nlm.nih.gov/6594053/)
28. Riley RD, Higgins JP, Deeks JJ (2011) Interpretation of random effects meta-analyses. *BMJ* 342: d549. doi: [10.1136/bmj.d549](https://doi.org/10.1136/bmj.d549) PMID: [21310794](https://pubmed.ncbi.nlm.nih.gov/21310794/)
29. Borenstein M, Hedges LV, Higgins JPT, Rothstein HR (2009) *Introduction to meta-analysis*. Chichester: John Wiley & Sons.
30. Guyatt GH, Oxman AD, Schunemann HJ, Tugwell P, Knottnerus A (2011) GRADE guidelines: a new series of articles in the *Journal of Clinical Epidemiology*. *J Clin Epidemiol* 64: 380–382. doi: [10.1016/j.jclinepi.2010.09.011](https://doi.org/10.1016/j.jclinepi.2010.09.011) PMID: [21185693](https://pubmed.ncbi.nlm.nih.gov/21185693/)
31. Guyatt GH, Oxman AD, Vist GE, Kunz G, Falck-Ytter Y, Schunemann HJ (2008) GRADE: what is “quality of evidence” and why is it important to clinicians? *BMJ* 336: 995–998. doi: [10.1136/bmj.39490.551019.BE](https://doi.org/10.1136/bmj.39490.551019.BE) PMID: [18456631](https://pubmed.ncbi.nlm.nih.gov/18456631/)
32. Stahl F, Baccetti T, Franchi L, McNamara JA Jr. (2008) Longitudinal growth changes in untreated subjects with Class II Division 1 malocclusion. *Am J Orthod Dentofacial Orthop* 134: 125–137. doi: [10.1016/j.ajodo.2006.06.028](https://doi.org/10.1016/j.ajodo.2006.06.028) PMID: [18617112](https://pubmed.ncbi.nlm.nih.gov/18617112/)
33. Tulloch JF, Phillips C, Koch G, Proffit WR (1997) The effect of early intervention on skeletal pattern in Class II malocclusion: a randomized clinical trial. *Am J Orthod Dentofacial Orthop* 111: 391–400. PMID: [9109584](https://pubmed.ncbi.nlm.nih.gov/9109584/)
34. Baccetti T, Franchi L, Toth LR, McNamara JA Jr. (2000) Treatment timing for Twin-block therapy. *Am J Orthod Dentofacial Orthop* 118: 159–170. PMID: [10935956](https://pubmed.ncbi.nlm.nih.gov/10935956/)
35. Faltin KJ, Faltin RM, Baccetti T, Franchi L, Ghiozzi B, McNamara JA Jr. (2003) Long-term effectiveness and treatment timing for Bionator therapy. *Angle Orthod* 73: 221–230. PMID: [12828429](https://pubmed.ncbi.nlm.nih.gov/12828429/)
36. O'Brien K, Wright J, Conboy F, Sanjie Y, Mandall N, Chadwick S, et al. (2003) Effectiveness of early orthodontic treatment with the Twin-block appliance: a multicenter, randomized, controlled trial. Part 1: Dental and skeletal effects. *Am J Orthod Dentofacial Orthop* 124: 234–243. PMID: [12970656](https://pubmed.ncbi.nlm.nih.gov/12970656/)
37. Quintão C, Helena I, Brunharo VP, Menezes RC, Almeida MA (2006) Soft tissue facial profile changes following functional appliance therapy. *Eur J Orthod* 28: 35–41. PMID: [16113035](https://pubmed.ncbi.nlm.nih.gov/16113035/)
38. Almeida-Pedrin RR, Almeida MR, Almeida RR, Pinzan A, Ferreira FP (2007) Treatment effects of headgear biteplane and bionator appliances. *Am J Orthod Dentofacial Orthop* 132: 191–198. PMID: [17693369](https://pubmed.ncbi.nlm.nih.gov/17693369/)

39. Cui L-J, Liu Y-F, Zuo Y-P, Lü T, Liu X, Liu X-C, et al. (2010) [Hard-soft tissue changes with the Twin-block appliance in Class II malocclusion patients]. *Chinese. J Clin Rehabil Tissue Eng Res* 14: 1572–1576.
40. Singh S, Singh M, Saini A, Misra V, Sharma VP, Singh GK (2010) Timing of myofunctional appliance therapy. *J Clin Pediatr Dent* 35: 233–240. PMID: [21417131](#)
41. Baysal A, Uysal T (2013) Soft tissue effects of Twin Block and Herbst appliances in patients with Class II division 1 mandibular retrognathia. *Eur J Orthod* 35: 71–81. doi: [10.1093/ejo/cjq187](#) PMID: [21357655](#)
42. Martina R, Cioffi I, Galeotti A, Tagliaferri R, Cimino R, Michelotti A, et al. (2013) Efficacy of the Sander bite-jumping appliance in growing patients with mandibular retrusion: a randomized controlled trial. *Orthod Craniofac Res* 16: 116–126. doi: [10.1111/ocr.12013](#) PMID: [23323608](#)
43. Perillo L, Femiano A, Palumbo S, Contardo L, Perinetti G (2013) Skeletal and dental effects produced by functional regulator-2 in pre-pubertal class II patients: a controlled study. *Prog Orthod* 14: 18. doi: [10.1186/2196-1042-14-18](#) PMID: [24325832](#)
44. Baysal A, Uysal T (2014) Dentoskeletal effects of Twin Block and Herbst appliances in patients with Class II division 1 mandibular retrognathia. *Eur J Orthod* 36: 164–172. doi: [10.1093/ejo/cjt013](#) PMID: [24663007](#)
45. Patil AS, Sable RB, Kothari RM (2012) Role of insulin-like growth factors (IGFs), their receptors and genetic regulation in the chondrogenesis and growth of the mandibular condylar cartilage. *J Cell Physiol* 227: 1796–1804. doi: [10.1002/jcp.22905](#) PMID: [21732349](#)
46. Masoud M, Masoud I, Kent RL Jr, Gowharji N, Cohen LE (2008) Assessing skeletal maturity by using blood spot insulin-like growth factor I (IGF-I) testing. *Am J Orthod Dentofacial Orthop* 134: 209–216. doi: [10.1016/j.ajodo.2006.09.063](#) PMID: [18675202](#)
47. Gupta S, Deoskar A, Gupta P, Jain S (2015) Serum insulin-like growth factor-1 levels in females and males in different cervical vertebral maturation stages. *Dental Press J Orthod* 20: 68–75.
48. Fishman LS (1982) Radiographic evaluation of skeletal maturation. A clinically oriented method based on hand-wrist films. *Angle Orthod* 52: 88–112. PMID: [6980608](#)
49. Hagg U, Taranger J (1982) Maturation indicators and the pubertal growth spurt. *Am J Orthod* 82: 299–309. PMID: [6961802](#)
50. Franchi L, Baccetti T, McNamara JA Jr (2000) Mandibular growth as related to cervical vertebral maturation and body height. *Am J Orthod Dentofacial Orthop* 118: 335–340. PMID: [10982936](#)
51. Perinetti G, Caprioglio A, Contardo L (2014) Visual assessment of the cervical vertebral maturation stages: A study of diagnostic accuracy and repeatability. *Angle Orthod* 84: 951–956. doi: [10.2319/120913-906.1](#) PMID: [24665865](#)
52. Perinetti G, Perillo L, Franchi L, Di Lenarda R, Contardo L (2014) Maturation of the middle phalanx of the third finger and cervical vertebrae: a comparative and diagnostic agreement study. *Orthod Craniofac Res* 17: 270–279. doi: [10.1111/ocr.12052](#) PMID: [25230196](#)
